# Supplementary material for: Ultralow H2O content analysis with a large-geometry secondary ion mass spectrometer
Source: Royal Society of Chemistry journal article supplement (doi:10.1039/d3ja00422h), 2024-01-01
Supplement: d3ja00422h1.xlsx [file d3ja00422h1.xlsx]

## Sheet: Table S1-SIMS-Glass
Sample #	Sample Chamber Pressure	PI (nA)	16O		18O		16O1H		18O/16O	2SE (%)	16O1H/16O	2SE (%)		δ18O				16O1H/16O
	(mbar)		cps	av.std (%)	cps	av.std (%)	cps	av.std (%)						Raw	2SE	ave.	2SD	ave.	2SD	2RSD (‰)	Blank-Corrected
Infrasil® 302@01	1.7e-09	3.25483	2080885000	0.143267	4251747	0.142205	9082.68	0.300026	0.00204324	0.0127215	4.36466e-06	0.349961		18.9712	0.470556	18.642	0.453033	4.43269e-06	2.08939e-07	4.7136	3.83211e-06
Infrasil® 302@02	1.7e-09	3.2589	2101537000	0.161579	4292967	0.161212	9148.86	0.264817	0.00204278	0.0123773	4.3533e-06	0.257355		18.7388	0.469637
Infrasil® 302@03	1.7e-09	3.33956	2148616000	0.134568	4389357	0.133899	9439.82	0.255937	0.00204288	0.0170763	4.39333e-06	0.294894		18.7896	0.484148
Infrasil® 302@04	1.7e-09	3.46184	2131189000	0.0236574	4352476	0.0244348	9711.49	0.137596	0.00204228	0.00964657	4.55685e-06	0.289606		18.4899	0.46319
Infrasil® 302@05	1.7e-09	3.40465	2084418000	0.0763904	4256423	0.0778809	9319.41	0.213497	0.00204202	0.0148412	4.47092e-06	0.307071		18.3618	0.476723
Infrasil® 302@06	1.7e-09	3.29997	2066746000	0.0826385	4221239	0.0840768	8980.26	0.245634	0.00204246	0.0121015	4.34505e-06	0.377942		18.5797	0.468917
Infrasil® 302@07	1.7e-09	3.29817	2075284000	0.0374942	4240164	0.0374784	9613.86	0.177728	0.00204317	0.014214	4.63251e-06	0.293577		18.9374	0.474808
Infrasil® 302@08	1.7e-09	3.22651	2055379000	0.0908116	4198970	0.089419	9210.28	0.221183	0.00204292	0.0132583	4.48098e-06	0.295503		18.8106	0.472035
Infrasil® 302@09	1.7e-09	3.21024	2053984000	0.0360829	4195463	0.037184	9166.2	0.20271	0.0020426	0.0128347	4.46261e-06	0.35054		18.65	0.470863
Infrasil® 302@10	1.7e-09	3.17762	2031049000	0.0488249	4148227	0.0466547	9010.64	0.159224	0.00204241	0.0121712	4.43642e-06	0.265254		18.5553	0.469098
Infrasil® 302@11	1.7e-09	3.1892	2038470000	0.0569289	4162858	0.0563969	9009.52	0.24076	0.00204215	0.0144121	4.41971e-06	0.433675		18.4261	0.475405
Infrasil® 302@12	1.7e-09	3.14711	2017811000	0.110234	4120310	0.110248	8486.04	0.278828	0.00204197	0.0146635	4.20544e-06	0.365926		18.3373	0.476173
Infrasil® 302@13	1.7e-09	3.11707	2038657000	0.0878169	4163091	0.0891811	8985.07	0.25876	0.00204207	0.0115657	4.40724e-06	0.362675		18.3897	0.467564
Infrasil® 302@14	1.7e-09	3.16706	2024859000	0.0476948	4137194	0.0495239	9169.96	0.124663	0.0020432	0.0169857	4.52867e-06	0.21633		18.9512	0.483829
HPFS® 7979@01	1.7e-09	3.11292	2029354000	0.0971153	4146079	0.0953578	2616.92	0.305621	0.00204305	0.0134373	1.28951e-06	0.508336		18.8779	0.455538	18.7889	0.435268	1.29575e-06	1.27587e-08	0.984657	6.95169e-07
HPFS® 7979@02	1.7e-09	3.09438	2034455000	0.10491	4157567	0.104451	2622.81	0.307703	0.00204358	0.0105285	1.28917e-06	0.482115		19.1392	0.447821
HPFS® 7979@03	1.7e-09	3.10745	2050863000	0.0868442	4190594	0.0887949	2671.87	0.207285	0.00204333	0.0133822	1.30279e-06	0.396937		19.0161	0.455375
HPFS® 7979@04	1.7e-09	3.12536	2025928000	0.0819372	4139112	0.0825735	2623.67	0.304841	0.00204307	0.0107256	1.29501e-06	0.49111		18.8854	0.448288
HPFS® 7979@05	1.7e-09	3.13264	2028427000	0.108556	4144430	0.111009	2632.54	0.263124	0.00204317	0.0103403	1.2978e-06	0.401389		18.9373	0.447382
HPFS® 7979@06	1.7e-09	3.17081	2035968000	0.101546	4160382	0.102267	2645.9	0.271486	0.00204344	0.0149265	1.29955e-06	0.427395		19.0709	0.460151
HPFS® 7979@07	1.7e-09	3.19217	2044157000	0.0868097	4176067	0.085706	2660.93	0.365599	0.00204293	0.0183176	1.30168e-06	0.600884		18.8156	0.472241
HPFS® 7979@08	1.7e-09	3.20101	2045256000	0.105714	4178068	0.107195	2660.67	0.415373	0.00204281	0.0182575	1.30083e-06	0.661525		18.7557	0.472009
HPFS® 7979@09	1.7e-09	3.24513	2090404000	0.112612	4268558	0.112048	2723.72	0.352577	0.00204198	0.0113412	1.30293e-06	0.58017		18.3413	0.449801
HPFS® 7979@10	1.7e-09	3.28652	2074442000	0.116852	4236429	0.118134	2678.72	0.325584	0.0020422	0.0153528	1.29125e-06	0.470606		18.4525	0.461551
HPFS® 7979@11	1.7e-09	3.3092	2085361000	0.133637	4259884	0.132326	2696.74	0.287463	0.00204276	0.0147677	1.29315e-06	0.410102		18.7298	0.459638
HPFS® 7979@12	1.7e-09	3.34785	2110150000	0.120227	4310928	0.119122	2705.48	0.33263	0.00204295	0.0110457	1.28209e-06	0.531712		18.8256	0.449065
HPFS® 7979@13	1.7e-09	3.37304	2156613000	0.427017	4405075	0.426561	2783.19	0.531835	0.00204259	0.0166284	1.29051e-06	0.568205		18.6465	0.465949
HPFS® 7979@14	1.7e-09	3.55571	2133652000	0.108563	4358172	0.108562	2765.71	0.327464	0.00204259	0.0102744	1.29621e-06	0.553714		18.6455	0.44723
HPFS® 7979@15	1.7e-09	3.41177	2154543000	0.184081	4401047	0.180193	2809.22	0.334991	0.00204268	0.012154	1.30381e-06	0.404993		18.6939	0.451919
SK-1310@01	1.7e-09	3.47513	2122108000	0.112547	4322705	0.113231	1289.36	0.288407	0.00203699	0.0101129	6.07582e-07	0.576815		15.8518	0.463952	15.8382	0.452796	6.00585e-07	9.79533e-09	1.63097	0
SK-1310@02	1.7e-09	3.33135	2115904000	0.12123	4311293	0.120581	1286.07	0.359574	0.00203757	0.0124645	6.07793e-07	0.57755		16.141	0.469639
SK-1310@03	1.7e-09	3.36006	2159472000	0.146597	4399764	0.143675	1293	0.340559	0.00203743	0.0143972	5.98755e-07	0.591522		16.0722	0.475134
SK-1310@04	1.7e-09	3.36718	2134421000	0.113744	4347625	0.112604	1277.69	0.371698	0.00203691	0.0131193	5.98592e-07	0.609128		15.8144	0.471419
SK-1310@05	1.7e-09	3.36553	2125100000	0.16204	4328346	0.162759	1284.68	0.364861	0.00203677	0.00966914	6.04502e-07	0.577864		15.7451	0.463005
SK-1310@06	1.7e-09	3.34785	2134484000	0.0878603	4348996	0.0872449	1297.95	0.383329	0.00203749	0.010879	6.08085e-07	0.748584		16.1046	0.465682
SK-1310@07	1.7e-09	3.36373	2123259000	0.132701	4323520	0.132732	1275.88	0.440045	0.00203627	0.0120084	6.00876e-07	0.714224		15.4927	0.468449
SK-1310@08	1.7e-09	3.35215	2123630000	0.141582	4325665	0.141025	1269.47	0.357329	0.00203692	0.0133636	5.97784e-07	0.655758		15.8194	0.472105
SK-1310@09	1.7e-09	3.36631	2148733000	0.152226	4376861	0.150944	1276.16	0.435622	0.00203695	0.0122139	5.93883e-07	0.66177		15.8343	0.46898
SK-1310@10	1.7e-09	3.36811	2127911000	0.151285	4332988	0.150671	1280.56	0.357732	0.00203627	0.00990344	6.0178e-07	0.578792		15.4922	0.4635
SK-1310@11	1.7e-09	3.36827	2120706000	0.170774	4318610	0.171612	1268.93	0.369474	0.0020364	0.0124595	5.98356e-07	0.660057		15.5605	0.469626
SK-1310@12	1.7e-09	3.36491	2130750000	0.1131	4341090	0.113446	1264.64	0.420151	0.00203735	0.0119681	5.9351e-07	0.757503		16.0348	0.468346
SK-1310@13	1.7e-09	3.3793	2133336000	0.132926	4346884	0.13323	1273.78	0.321589	0.0020376	0.0117343	5.97078e-07	0.58033		16.1575	0.467754
SK-1310@14	1.7e-09	3.37468	2138337000	0.139745	4355498	0.138802	1292.04	0.393533	0.00203686	0.0117014	6.04214e-07	0.676674		15.7904	0.467672
SK-1310@15	1.7e-09	3.40856	2143854000	0.139743	4366181	0.139214	1277.7	0.361731	0.0020366	0.0123811	5.95979e-07	0.654542		15.6613	0.469418
Suprasil® 3002@01	1.7e-09	3.7272	2264424000	0.084973	4610297	0.0836529	1425.94	0.324501	0.00203597	0.0122826	6.2971e-07	0.59152		15.3446	0.477048	15.2215	0.460965	6.40002e-07	1.57417e-08	2.45964	3.94172e-08
Suprasil® 3002@02	1.7e-09	3.62737	2271490000	0.141033	4625734	0.140169	1420.77	0.492353	0.00203643	0.0137285	6.25478e-07	0.933971		15.5755	0.480974
Suprasil® 3002@03	1.7e-09	3.54844	2215467000	0.0819382	4509689	0.0822886	1418.93	0.399081	0.00203555	0.012855	6.40448e-07	0.703303		15.1346	0.478554
Suprasil® 3002@04	1.7e-09	3.54985	2228715000	0.0881807	4537040	0.0879755	1428.71	0.3043	0.00203572	0.0104563	6.41042e-07	0.554955		15.2204	0.472676
Suprasil® 3002@05	1.7e-09	3.51026	2201137000	0.0974104	4479220	0.0991829	1429.56	0.281969	0.00203496	0.0314841	6.49458e-07	0.547801		14.8399	0.558224
Suprasil® 3002@06	1.7e-09	3.50017	2190905000	0.101942	4460154	0.098527	1426.55	0.33292	0.00203576	0.0148201	6.51119e-07	0.620539		15.2409	0.484203
Suprasil® 3002@07	1.7e-09	3.51613	2206565000	0.0835784	4492778	0.0821426	1415.9	0.312459	0.0020361	0.017329	6.41676e-07	0.587114		15.4084	0.492461
Suprasil® 3002@08	1.7e-09	3.5227	2214171000	0.119802	4507035	0.121375	1418.73	0.468341	0.00203554	0.0213779	6.40761e-07	0.955344		15.1307	0.508124
Suprasil® 3002@09	1.7e-09	3.51605	2231560000	0.116443	4542443	0.117288	1432.23	0.430948	0.00203555	0.0131859	6.41807e-07	0.832077		15.1337	0.479453
Suprasil® 3002@10	1.7e-09	3.5324	2190020000	0.0772321	4456859	0.0795673	1413.94	0.443899	0.00203508	0.0118432	6.45609e-07	0.796439		14.8993	0.475936
Suprasil® 3002@11	1.7e-09	3.50916	2209513000	0.0929251	4499226	0.092151	1398.45	0.339664	0.0020363	0.0180357	6.32912e-07	0.589409		15.5087	0.494992

## Sheet: Table S2-SIMS-Olivine
Sample #	Sample Chamber Pressure	Time in seq.	PI (nA)	16O		18O		16O1H		18O/16O	2SE (%)	16O1H/16O	2SE (%)		δ18O				16O1H/16O
	(mbar)	(hours)		cps	av.std (%)	cps	av.std (%)	cps	av.std (%)						Raw	2SE	ave.	2SD	ave.	2SD	2RSD (‰)	Blank-Corrected
ICH-30@01	1.7e-09	0.8	3.70646	2.24247e+09	0.0993767	4.54339e+06	0.103756	16152.6	0.121356	0.00202607	0.0135018	7.20304e-06	0.242712		10.4069	0.493883	9.93996	0.47507	7.09721e-06	3.8146e-07	5.37479	6.49662e-06
ICH-30@02	1.7e-09	1	3.70553	2.2419e+09	0.0994207	4.54027e+06	0.103825	16480.8	0.120529	0.00202519	0.0135107	7.35128e-06	0.24106		9.96709	0.493908
ICH-30@03	1.7e-09	2.38333	3.64161	2.20323e+09	0.100214	4.4615e+06	0.104663	15497.5	0.125539	0.00202498	0.0136197	7.03398e-06	0.251079		9.86435	0.494207
ICH-30@04	1.7e-09	2.58333	3.66962	2.22018e+09	0.0994217	4.49668e+06	0.103821	16220.5	0.115464	0.00202537	0.0135102	7.30594e-06	0.230928		10.0588	0.493907
ICH-30@05	1.7e-09	3.98333	3.60265	2.17966e+09	0.100271	4.41397e+06	0.104746	15823.8	0.125342	0.00202507	0.0136306	7.25974e-06	0.250685		9.91123	0.494237
ICH-30@06	1.7e-09	4.18333	3.61055	2.18444e+09	0.100564	4.42314e+06	0.10506	14898.7	0.139759	0.00202484	0.0136714	6.82035e-06	0.279518		9.79354	0.49435
ICH-30@07	1.7e-09	5.58333	3.61235	2.18553e+09	0.100615	4.42595e+06	0.105132	15566.3	0.137978	0.00202512	0.0136808	7.12245e-06	0.275957		9.93168	0.494376
ICH-30@08	1.7e-09	5.78333	3.59444	2.17469e+09	0.101008	4.40513e+06	0.105518	15119.1	0.140602	0.00202564	0.0137311	6.95231e-06	0.281205		10.191	0.494515
ICH-30@09	1.7e-09	7.16667	3.62354	2.1923e+09	0.10043	4.43845e+06	0.104926	14941.9	0.131905	0.00202456	0.013654	6.81564e-06	0.26381		9.65689	0.494302
ICH-30@10	1.7e-09	7.36667	3.57746	2.16442e+09	0.10035	4.38184e+06	0.104818	15383.2	0.129221	0.00202449	0.01364	7.10731e-06	0.258444		9.61799	0.494263
KLB-1@01	1.7e-09	1.2	3.68855	2.23163e+09	0.0991054	4.51892e+06	0.1035	7426.09	0.169648	0.00202494	0.0134685	3.32765e-06	0.339296		9.8449	0.591813	9.93143	0.576284	3.40955e-06	2.28197e-07	6.69289	2.80896e-06
KLB-1@02	1.7e-09	1.4	3.7092	2.24413e+09	0.0993927	4.54367e+06	0.103808	7319.28	0.172171	0.0020247	0.0135085	3.26153e-06	0.344342		9.72322	0.591905
KLB-1@03	1.7e-09	2.78333	3.64208	2.20352e+09	0.100247	4.46098e+06	0.10471	7157.08	0.178286	0.00202448	0.0136259	3.24803e-06	0.356573		9.617	0.592174
KLB-1@04	1.7e-09	2.98333	3.59405	2.17445e+09	0.0994836	4.40477e+06	0.103878	7414.77	0.173807	0.00202569	0.0135176	3.40994e-06	0.347615		10.2174	0.591925
KLB-1@05	1.7e-09	4.38333	3.64012	2.20233e+09	0.09904	4.46004e+06	0.103452	7868.17	0.172949	0.00202515	0.0134622	3.57265e-06	0.345899		9.94714	0.591799
KLB-1@06	1.7e-09	4.58333	3.64795	2.20707e+09	0.0999933	4.46913e+06	0.104458	7514.79	0.178963	0.00202492	0.0135931	3.40488e-06	0.357927		9.83493	0.592098
KLB-1@07	1.7e-09	5.98333	3.59295	2.17379e+09	0.100216	4.40468e+06	0.104631	7691.24	0.179208	0.00202626	0.0136156	3.53817e-06	0.358417		10.5047	0.59215
KLB-1@08	1.7e-09	6.18333	3.58513	2.16906e+09	0.100239	4.39267e+06	0.104684	7561.66	0.1809	0.00202515	0.0136226	3.48615e-06	0.3618		9.94963	0.592166
KLB-1@09	1.7e-09	7.56667	3.63261	2.19779e+09	0.0996749	4.44912e+06	0.104113	7346	0.186033	0.00202436	0.0135482	3.34245e-06	0.372067		9.55516	0.591995
KLB-1@10	1.7e-09	7.76667	3.6147	2.18695e+09	0.100918	4.42965e+06	0.105388	7663.1	0.184358	0.00202549	0.0137141	3.50401e-06	0.368716		10.1202	0.592377
Mongok@01	1.7e-09	0.4	3.63598	2.19982e+09	0.103669	4.54109e+06	0.107247	36167.4	0.0915908	0.00206429	0.0139563	1.6441e-05	0.183183		29.4709	0.344896	29.1572	0.315397	1.65091e-05	1.30871e-06	7.92721	1.59085e-05
Mongok@02	1.7e-09	0.6	3.67775	2.2251e+09	0.103039	4.59264e+06	0.106599	37191.9	0.0903248	0.00206402	0.013872	1.67147e-05	0.180651		29.3317	0.344555
Mongok@03	1.7e-09	1.98333	3.7225	2.25217e+09	0.103725	4.64706e+06	0.107356	34161.1	0.0902145	0.00206337	0.0139704	1.51681e-05	0.18043		29.0091	0.344953
Mongok@04	1.7e-09	2.18333	3.64654	2.20621e+09	0.104674	4.55332e+06	0.108303	36182.8	0.0877572	0.00206386	0.0140937	1.64004e-05	0.175516		29.2559	0.345454
Mongok@05	1.7e-09	3.58333	3.5493	2.14738e+09	0.104797	4.4315e+06	0.108436	36504.1	0.0867856	0.00206368	0.014111	1.69994e-05	0.173572		29.1617	0.345524
Mongok@06	1.7e-09	3.78333	3.568	2.15869e+09	0.105335	4.45452e+06	0.109026	37333.2	0.0865585	0.00206353	0.0141878	1.72943e-05	0.173119		29.0884	0.345839
Mongok@07	1.7e-09	5.18333	3.57902	2.16537e+09	0.105164	4.46764e+06	0.108856	37671.4	0.0865156	0.00206323	0.0141657	1.73972e-05	0.173033		28.9373	0.345748
Mongok@08	1.7e-09	5.38333	3.56909	2.15936e+09	0.104161	4.45611e+06	0.107802	35319.9	0.0883784	0.00206363	0.0140285	1.63567e-05	0.176758		29.1397	0.345188
Mongok@09	1.7e-09	6.76667	3.56369	2.15609e+09	0.103726	4.44909e+06	0.107353	35281.4	0.0882866	0.0020635	0.0139701	1.63636e-05	0.176575		29.0739	0.344952
Mongok@10	1.7e-09	6.96667	3.57034	2.16011e+09	0.104627	4.45752e+06	0.108289	34466	0.0902114	0.00206356	0.0140919	1.59556e-05	0.180424		29.1033	0.345446
San Carlos@01	1.7e-09	0	3.71045	2.24488e+09	0.0992006	4.54584e+06	0.103599	4286.01	0.203163	0.00202498	0.0134814	1.90924e-06	0.406327		9.86336	0.533638	9.59088	0.516328	1.90314e-06	4.32903e-08	2.27468	1.30255e-06
San Carlos@02	1.7e-09	0.2	3.86082	2.33585e+09	0.0999017	4.72803e+06	0.104383	4477.58	0.205514	0.00202411	0.0135834	1.91689e-06	0.411029		9.43198	0.533896
San Carlos@03	1.7e-09	1.6	3.71781	2.24933e+09	0.100227	4.55391e+06	0.104687	4194.56	0.216684	0.00202456	0.0136229	1.8648e-06	0.433368		9.6549	0.533997
San Carlos@04	1.7e-09	1.78333	3.66359	2.21653e+09	0.099419	4.4872e+06	0.103869	4221.86	0.245455	0.00202442	0.0135164	1.90471e-06	0.490911		9.58707	0.533726
San Carlos@05	1.7e-09	3.18333	3.65374	2.21057e+09	0.101408	4.47591e+06	0.105973	4261.06	0.225898	0.00202478	0.0137902	1.92759e-06	0.451796		9.76361	0.534426
San Carlos@06	1.7e-09	3.38333	3.60922	2.18364e+09	0.100845	4.4188e+06	0.10534	4103.87	0.228083	0.0020236	0.0137078	1.87937e-06	0.456166		9.17465	0.534214
San Carlos@07	1.7e-09	4.78333	3.61165	2.1851e+09	0.100547	4.42316e+06	0.105031	4220.35	0.23238	0.00202423	0.0136677	1.93142e-06	0.464761		9.49082	0.534111
San Carlos@08	1.7e-09	4.98333	3.57558	2.16328e+09	0.100048	4.3805e+06	0.10449	4090.48	0.234385	0.00202493	0.0135973	1.89087e-06	0.46877		9.83892	0.533932
San Carlos@09	1.7e-09	6.38333	3.55806	2.15268e+09	0.101586	4.35749e+06	0.106133	4136.26	0.242968	0.00202421	0.0138111	1.92145e-06	0.485936		9.48185	0.53448
San Carlos@10	1.7e-09	6.56667	3.54609	2.14544e+09	0.100186	4.34475e+06	0.10463	4090.47	0.241333	0.00202511	0.0136155	1.90659e-06	0.482667		9.92869	0.533978
San Carlos@11	1.7e-09	7.96667	3.61767	2.18875e+09	0.100727	4.43121e+06	0.105239	4198.44	0.247199	0.00202454	0.0136946	1.91819e-06	0.494399		9.64642	0.534181
San Carlos@12	1.7e-09	8.16667	3.6215	2.19107e+09	0.100827	4.43674e+06	0.105308	4068.8	0.25265	0.00202492	0.0137037	1.85699e-06	0.505301		9.83543	0.534204
San Carlos@13	1.7e-09	8.36667	3.66852	2.21951e+09	0.0999977	4.49098e+06	0.104476	4196.12	0.250945	0.00202341	0.0135955	1.89056e-06	0.501891		9.07989	0.533927
San Carlos@14	1.7e-09	8.56667	3.58826	2.17095e+09	0.101277	4.39548e+06	0.105749	4143.12	0.253371	0.00202468	0.0137611	1.90844e-06	0.506742		9.71424	0.534351
San Carlos@15	1.7e-09	8.81667	3.49242	2.11297e+09	0.102479	4.27601e+06	0.107021	4018.65	0.257195	0.0020237	0.0139266	1.90189e-06	0.514391		9.22402	0.53478
San Carlos@16	1.7e-09	9.01667	3.48202	2.10668e+09	0.103138	4.26544e+06	0.107738	4047.32	0.257876	0.00202473	0.0140198	1.92119e-06	0.515752		9.73818	0.535024

## Sheet: Table S2-FTIR
Infrasil® 302@01		Infrasil® 302@02		Infrasil® 302@03		Suprasil® 3002@01		Suprasil® 3002@02		Suprasil® 3002@03		HPFS® 7979@01		HPFS® 7979@02		HPFS® 7979@03		SK-1310@01		SK-1310@02		SK-1310@03
Wavenumber	Absorbance (cm-1)	Wavenumber	Absorbance (cm-1)	Wavenumber	Absorbance (cm-1)	Wavenumber	Absorbance (cm-1)	Wavenumber	Absorbance (cm-1)	Wavenumber	Absorbance (cm-1)	Wavenumber	Absorbance (cm-1)	Wavenumber	Absorbance (cm-1)	Wavenumber	Absorbance (cm-1)	Wavenumber	Absorbance (cm-1)	Wavenumber	Absorbance (cm-1)	Wavenumber	Absorbance (cm-1)
2998.59	-0.000847	2998.59	-0.00202	2998.59	-0.000696	2998.59	-0.00341976	2998.59	-0.00100243	2998.59	-0.00184834	2998.59	-0.00107	2998.59	-0.000919	2998.59	-0.000360608	2998.59	-0.00184846	2998.59	-0.00157392	2998.59	-0.00215471
3000.52	-0.00056	3000.52	-0.00175	3000.52	-0.000418	3000.52	-0.00348091	3000.52	-0.000529766	3000.52	-0.00164401	3000.52	-0.000905	3000.52	-0.000804	3000.52	-0.000127971	3000.52	-0.00184166	3000.52	-0.00130141	3000.52	-0.00149429
3002.45	-0.000316	3002.45	-0.00144	3002.45	-0.000118	3002.45	-0.003214	3002.45	-0.000232339	3002.45	-0.00118399	3002.45	-0.000737	3002.45	-0.000709	3002.45	4.4167e-05	3002.45	-0.00151873	3002.45	-0.00107109	3002.45	-0.00115395
3004.38	-0.00015	3004.38	-0.00112	3004.38	0.000202	3004.38	-0.0027082	3004.38	-0.000351071	3004.38	-0.000864387	3004.38	-0.000554	3004.38	-0.000655	3004.38	5.579e-05	3004.38	-0.00102818	3004.38	-0.00103509	3004.38	-0.0012424
3006.31	-5.25e-06	3006.31	-0.000906	3006.31	0.000604	3006.31	-0.0020827	3006.31	-0.000448942	3006.31	-0.00083828	3006.31	-0.00043	3006.31	-0.000613	3006.31	8.85725e-05	3006.31	-0.000694632	3006.31	-0.000873208	3006.31	-0.00130069
3008.23	9.35e-05	3008.23	-0.000812	3008.23	0.00096	3008.23	-0.00158489	3008.23	-0.000196218	3008.23	-0.00106204	3008.23	-0.000349	3008.23	-0.000646	3008.23	0.000226855	3008.23	-0.000464797	3008.23	-0.000444889	3008.23	-0.00104523
3010.16	0.000134	3010.16	-0.000713	3010.16	0.0011	3010.16	-0.00151849	3010.16	0.0001508	3010.16	-0.00122929	3010.16	-0.000293	3010.16	-0.000848	3010.16	0.000332057	3010.16	-0.000107884	3010.16	-0.000183582	3010.16	-0.000606418
3012.09	0.000158	3012.09	-0.000574	3012.09	0.00107	3012.09	-0.00178194	3012.09	4.07696e-05	3012.09	-0.000995874	3012.09	-0.000318	3012.09	-0.00108	3012.09	0.000342488	3012.09	0.00015831	3012.09	-0.000169873	3012.09	-0.000234723
3014.02	0.000138	3014.02	-0.000548	3014.02	0.00101	3014.02	-0.00192916	3014.02	-0.000485897	3014.02	-0.000466347	3014.02	-0.000362	3014.02	-0.00115	3014.02	0.000331998	3014.02	7.7486e-05	3014.02	-0.000178218	3014.02	-0.000136495
3015.95	-3.34e-05	3015.95	-0.000652	3015.95	0.00102	3015.95	-0.00147915	3015.95	-0.00072968	3015.95	6.96182e-05	3015.95	-0.00036	3015.95	-0.00117	3015.95	0.000288784	3015.95	-0.00027132	3015.95	-0.000252843	3015.95	-0.00035739
3017.88	-0.000328	3017.88	-0.000732	3017.88	0.00117	3017.88	-0.00110877	3017.88	-0.000308275	3017.88	0.000466824	3017.88	-0.000353	3017.88	-0.00126	3017.88	0.000152707	3017.88	-0.000581265	3017.88	-0.000226974	3017.88	-0.000633359
3019.8	-0.000504	3019.8	-0.000754	3019.8	0.00139	3019.8	-0.000943184	3019.8	0.000453234	3019.8	0.000675201	3019.8	-0.000426	3019.8	-0.000998	3019.8	-1.49012e-05	3019.8	-0.000237703	3019.8	1.95503e-05	3019.8	-0.000622988
3021.73	-0.000467	3021.73	-0.000844	3021.73	0.00148	3021.73	-0.000723839	3021.73	0.000965953	3021.73	0.00053668	3021.73	-0.000436	3021.73	-0.000752	3021.73	-0.000195563	3021.73	0.000700831	3021.73	0.000191331	3021.73	-0.000376105
3023.66	-0.000459	3023.66	-0.000953	3023.66	0.00135	3023.66	-0.000273466	3023.66	0.000839233	3023.66	8.36849e-05	3023.66	-0.000489	3023.66	-0.000728	3023.66	-0.000404358	3023.66	0.00122488	3023.66	0.000184774	3023.66	-0.000233769
3025.59	-0.000605	3025.59	-0.000941	3025.59	0.00114	3025.59	0.000480413	3025.59	0.000274897	3025.59	-0.000293851	3025.59	-0.000467	3025.59	-0.000784	3025.59	-0.000530779	3025.59	0.00100541	3025.59	7.64131e-05	3025.59	-0.000239491
3027.52	-0.000795	3027.52	-0.000916	3027.52	0.000961	3027.52	0.00118506	3027.52	-1.74046e-05	3027.52	-0.000324965	3027.52	-0.000476	3027.52	-0.00074	3027.52	-0.000546455	3027.52	0.000517964	3027.52	-0.00014317	3027.52	-2.32458e-05
3029.45	-0.00104	3029.45	-0.0011	3029.45	0.000869	3029.45	0.00128806	3029.45	0.000109911	3029.45	-0.000207186	3029.45	-0.000563	3029.45	-0.000727	3029.45	-0.00059408	3029.45	-5.96046e-06	3029.45	-0.000306606	3029.45	0.000389814
3031.38	-0.00142	3031.38	-0.00136	3031.38	0.000782	3031.38	0.00103235	3031.38	-0.000110626	3031.38	-0.000186324	3031.38	-0.000678	3031.38	-0.000845	3031.38	-0.000785291	3031.38	-0.000407696	3031.38	-0.000332713	3031.38	0.000311494
3033.3	-0.00178	3033.3	-0.00161	3033.3	0.000674	3033.3	0.000968814	3033.3	-0.000921369	3033.3	-1.40667e-05	3033.3	-0.000815	3033.3	-0.000952	3033.3	-0.00106013	3033.3	-0.00038898	3033.3	-0.000555038	3033.3	-0.000499487
3035.23	-0.00199	3035.23	-0.00157	3035.23	0.000657	3035.23	0.000891328	3035.23	-0.00145221	3035.23	0.000142097	3035.23	-0.000878	3035.23	-0.000939	3035.23	-0.00127435	3035.23	7.06911e-05	3035.23	-0.000861764	3035.23	-0.00103128
3037.16	-0.00215	3037.16	-0.00136	3037.16	0.000655	3037.16	0.000468731	3037.16	-0.00139415	3037.16	-0.000188589	3037.16	-0.000824	3037.16	-0.00083	3037.16	-0.00120568	3037.16	0.000406861	3037.16	-0.000791192	3037.16	-0.00075531
3039.09	-0.00243	3039.09	-0.00123	3039.09	0.000477	3039.09	0.000185132	3039.09	-0.00132775	3039.09	-0.00059557	3039.09	-0.000756	3039.09	-0.000699	3039.09	-0.00122952	3039.09	0.000241399	3039.09	-0.000656009	3039.09	-0.000375748
3041.02	-0.00274	3041.02	-0.00133	3041.02	0.000221	3041.02	0.000454783	3041.02	-0.00145209	3041.02	-0.000732303	3041.02	-0.000715	3041.02	-0.00059	3041.02	-0.00135917	3041.02	-6.19888e-06	3041.02	-0.000901341	3041.02	-0.000401735
3042.95	-0.00292	3042.95	-0.00148	3042.95	0.000162	3042.95	0.000817895	3042.95	-0.00160301	3042.95	-0.00086534	3042.95	-0.000646	3042.95	-0.000458	3042.95	-0.00142223	3042.95	-6.67572e-05	3042.95	-0.00129449	3042.95	-0.000635862
3044.87	-0.003	3044.87	-0.00151	3044.87	0.000261	3044.87	0.000809312	3044.87	-0.00163913	3044.87	-0.00110781	3044.87	-0.000527	3044.87	-0.000275	3044.87	-0.00138462	3044.87	-0.000164866	3044.87	-0.00141168	3044.87	-0.000635862
3046.8	-0.0029	3046.8	-0.00149	3046.8	0.000208	3046.8	0.000442147	3046.8	-0.00163472	3046.8	-0.00141048	3046.8	-0.000429	3046.8	-0.000158	3046.8	-0.00134903	3046.8	-0.000384808	3046.8	-0.00113046	3046.8	-0.00016737
3048.73	-0.00293	3048.73	-0.0015	3048.73	-9.06e-05	3048.73	-9.31025e-05	3048.73	-0.00152862	3048.73	-0.0017277	3048.73	-0.00045	3048.73	-0.000261	3048.73	-0.00137246	3048.73	-0.000557184	3048.73	-0.00107157	3048.73	0.000190139
3050.66	-0.00291	3050.66	-0.00149	3050.66	-0.000322	3050.66	-0.000625372	3050.66	-0.000848174	3050.66	-0.00176847	3050.66	-0.000522	3050.66	-0.00043	3050.66	-0.00141859	3050.66	-0.000493288	3050.66	-0.00130379	3050.66	2.57492e-05
3052.59	-0.00279	3052.59	-0.00133	3052.59	-0.000257	3052.59	-0.000596762	3052.59	6.61612e-05	3052.59	-0.00162268	3052.59	-0.000517	3052.59	-0.000388	3052.59	-0.00141788	3052.59	-0.000207067	3052.59	-0.00148463	3052.59	-6.90222e-05
3054.52	-0.00267	3054.52	-0.00111	3054.52	-0.000162	3054.52	-7.10487e-05	3054.52	0.000106811	3054.52	-0.00174701	3054.52	-0.000433	3054.52	-0.000215	3054.52	-0.00134248	3054.52	7.86781e-05	3054.52	-0.00137758	3054.52	0.000145316
3056.44	-0.00259	3056.44	-0.000967	3056.44	-0.000324	3056.44	0.000511766	3056.44	-0.000931144	3056.44	-0.00195312	3056.44	-0.000321	3056.44	-7.12e-05	3056.44	-0.00115919	3056.44	0.00020504	3056.44	-0.000974536	3056.44	0.000223041
3058.37	-0.00249	3058.37	-0.000888	3058.37	-0.000575	3058.37	0.000860214	3058.37	-0.00174296	3058.37	-0.00164306	3058.37	-0.000317	3058.37	5.47e-05	3058.37	-0.000937641	3058.37	6.97374e-05	3058.37	-0.000713229	3058.37	0.000106096
3060.3	-0.00243	3060.3	-0.000744	3060.3	-0.000665	3060.3	0.00109458	3060.3	-0.00138152	3060.3	-0.00116348	3060.3	-0.000441	3060.3	0.000114	3060.3	-0.000816166	3060.3	-0.000379205	3060.3	-0.000835657	3060.3	3.09944e-06
3062.23	-0.00247	3062.23	-0.000567	3062.23	-0.000717	3062.23	0.00129759	3062.23	-0.000686884	3062.23	-0.000851393	3062.23	-0.000456	3062.23	8.49e-05	3062.23	-0.000875652	3062.23	-0.000681758	3062.23	-0.000840664	3062.23	-9.40561e-05
3064.16	-0.00258	3064.16	-0.000521	3064.16	-0.000911	3064.16	0.001351	3064.16	-0.000674129	3064.16	-0.000594258	3064.16	-0.000419	3064.16	1.91e-05	3064.16	-0.00113338	3064.16	-0.000461817	3064.16	-0.000476003	3064.16	-0.000121117
3066.09	-0.00267	3066.09	-0.000632	3066.09	-0.0011	3066.09	0.00130069	3066.09	-0.00083375	3066.09	-0.000589728	3066.09	-0.000591	3066.09	-0.00013	3066.09	-0.00134522	3066.09	-0.000259399	3066.09	-0.000104427	3066.09	-0.000101209
3068.01	-0.00262	3068.01	-0.000715	3068.01	-0.00111	3068.01	0.00129223	3068.01	-0.00079906	3068.01	-0.000836372	3068.01	-0.000749	3068.01	-0.000232	3068.01	-0.00129402	3068.01	-0.000399113	3068.01	4.6134e-05	3068.01	-0.000233054
3069.94	-0.0025	3069.94	-0.000754	3069.94	-0.00107	3069.94	0.00132167	3069.94	-0.000803709	3069.94	-0.00104725	3069.94	-0.000688	3069.94	-8.28e-05	3069.94	-0.00110418	3069.94	-0.000348687	3069.94	-4.24385e-05	3069.94	-0.000355959
3071.87	-0.0024	3071.87	-0.000874	3071.87	-0.00106	3071.87	0.00124824	3071.87	-0.00113356	3071.87	-0.000992656	3071.87	-0.000675	3071.87	0.000128	3071.87	-0.000946164	3071.87	-4.05312e-05	3071.87	-0.000377893	3071.87	-0.00022912
3073.8	-0.00226	3073.8	-0.000957	3073.8	-0.00103	3073.8	0.000969887	3073.8	-0.00171113	3073.8	-0.000657797	3073.8	-0.000794	3073.8	0.00016	3073.8	-0.000912845	3073.8	-0.000122428	3073.8	-0.000793934	3073.8	-6.75917e-05
3075.73	-0.00212	3075.73	-0.000932	3075.73	-0.00108	3075.73	0.000680089	3075.73	-0.00206649	3075.73	-0.000560761	3075.73	-0.000823	3075.73	5.43e-05	3075.73	-0.000913024	3075.73	-0.000601888	3075.73	-0.000894666	3075.73	-8.15392e-05
3077.66	-0.00211	3077.66	-0.00097	3077.66	-0.0011	3077.66	0.00066328	3077.66	-0.00197518	3077.66	-0.000990987	3077.66	-0.00071	3077.66	-0.000115	3077.66	-0.000827551	3077.66	-0.000867367	3077.66	-0.000555754	3077.66	-0.000153661
3079.58	-0.00219	3079.58	-0.00102	3079.58	-0.00112	3079.58	0.000724792	3079.58	-0.00171804	3079.58	-0.00152361	3079.58	-0.000582	3079.58	-0.000262	3079.58	-0.000843406	3079.58	-0.000772715	3079.58	-0.000330806	3079.58	-0.000270367
3081.51	-0.00225	3081.51	-0.000977	3081.51	-0.00117	3081.51	0.000516057	3081.51	-0.00158298	3081.51	-0.00179124	3081.51	-0.000548	3081.51	-0.000263	3081.51	-0.00104672	3081.51	-0.000303864	3081.51	-0.000566125	3081.51	-0.000291944
3083.44	-0.00231	3083.44	-0.000908	3083.44	-0.00133	3083.44	0.000463009	3083.44	-0.00149429	3083.44	-0.00162172	3083.44	-0.000603	3083.44	-0.000126	3083.44	-0.00112045	3083.44	0.000272512	3083.44	-0.000839829	3083.44	2.5034e-06
3085.37	-0.00232	3085.37	-0.000869	3085.37	-0.00142	3085.37	0.000815034	3085.37	-0.00130916	3085.37	-0.00103068	3085.37	-0.00062	3085.37	1.42e-05	3085.37	-0.000969052	3085.37	0.000291467	3085.37	-0.000851035	3085.37	0.000213385
3087.3	-0.00226	3087.3	-0.000918	3087.3	-0.00142	3087.3	0.000759482	3087.3	-0.00118673	3087.3	-0.000557542	3087.3	-0.0006	3087.3	8.07e-05	3087.3	-0.000948966	3087.3	-0.000169277	3087.3	-0.000746608	3087.3	0.000140905
3089.23	-0.00218	3089.23	-0.00101	3089.23	-0.00138	3089.23	0.000224233	3089.23	-0.00127757	3089.23	-0.000538588	3089.23	-0.000591	3089.23	0.000101	3089.23	-0.00110042	3089.23	-0.000324369	3089.23	-0.000654101	3089.23	0.000235558
3091.15	-0.00206	3091.15	-0.000881	3091.15	-0.00125	3091.15	0.00018239	3091.15	-0.00134599	3091.15	-0.00068903	3091.15	-0.000478	3091.15	0.000182	3091.15	-0.00106603	3091.15	-7.20024e-05	3091.15	-0.000521898	3091.15	0.000579715
3093.08	-0.00182	3093.08	-0.00055	3093.08	-0.00103	3093.08	0.0007025	3093.08	-0.00115347	3093.08	-0.000816941	3093.08	-0.000271	3093.08	0.000227	3093.08	-0.000822663	3093.08	4.23193e-05	3093.08	-0.000306249	3093.08	0.000796318
3095.01	-0.00162	3095.01	-0.000284	3095.01	-0.000894	3095.01	0.000938892	3095.01	-0.000697136	3095.01	-0.000988722	3095.01	-0.000192	3095.01	0.000133	3095.01	-0.000653386	3095.01	-6.50883e-05	3095.01	-8.70228e-05	3095.01	0.000640631
3096.94	-0.00167	3096.94	-0.000187	3096.94	-0.000863	3096.94	0.000562429	3096.94	-0.000101328	3096.94	-0.00134337	3096.94	-0.000263	3096.94	7.86e-05	3096.94	-0.00064522	3096.94	-9.88245e-05	3096.94	8.34465e-07	3096.94	0.000353098
3098.87	-0.00186	3098.87	-0.000154	3098.87	-0.000775	3098.87	7.79629e-05	3098.87	0.000349522	3098.87	-0.00170398	3098.87	-0.000338	3098.87	0.000261	3098.87	-0.000621617	3098.87	3.45707e-05	3098.87	-0.00025332	3098.87	0.000335574
3100.8	-0.00191	3100.8	-0.000154	3100.8	-0.000643	3100.8	-0.000102878	3100.8	0.000442624	3100.8	-0.00156689	3100.8	-0.000355	3100.8	0.000484	3100.8	-0.000493646	3100.8	0.000306487	3100.8	-0.000686526	3100.8	0.000367641
3102.72	-0.00183	3102.72	-0.000332	3102.72	-0.000669	3102.72	6.13928e-05	3102.72	0.00020349	3102.72	-0.000950456	3102.72	-0.000326	3102.72	0.000507	3102.72	-0.000410438	3102.72	0.000508189	3102.72	-0.000663877	3102.72	0.000125527
3104.65	-0.00172	3104.65	-0.000621	3104.65	-0.000889	3104.65	0.000462294	3104.65	-0.000274181	3104.65	-0.000452757	3104.65	-0.000313	3104.65	0.000386	3104.65	-0.000446558	3104.65	0.000443459	3104.65	-0.000228047	3104.65	-7.42674e-05
3106.58	-0.00167	3106.58	-0.000734	3106.58	-0.00102	3106.58	0.000489831	3106.58	-0.0008111	3106.58	-0.000633359	3106.58	-0.000321	3106.58	0.000239	3106.58	-0.000524998	3106.58	0.000135899	3106.58	3.21865e-05	3106.58	-6.0916e-05
3108.51	-0.00168	3108.51	-0.000614	3108.51	-0.00093	3108.51	-0.00019455	3108.51	-0.00117362	3108.51	-0.0011456	3108.51	-0.000328	3108.51	0.000221	3108.51	-0.000600815	3108.51	-0.000395417	3108.51	-1.70469e-05	3108.51	-8.01086e-05
3110.44	-0.00169	3110.44	-0.000428	3110.44	-0.000767	3110.44	-0.000935197	3110.44	-0.00135863	3110.44	-0.00104594	3110.44	-0.000382	3110.44	0.000349	3110.44	-0.000590801	3110.44	-0.00094831	3110.44	-0.000261307	3110.44	-0.000132561
3112.37	-0.00178	3112.37	-0.000351	3112.37	-0.000871	3112.37	-0.00124729	3112.37	-0.00134051	3112.37	-0.000691414	3112.37	-0.000528	3112.37	0.000299	3112.37	-0.000498593	3112.37	-0.00134039	3112.37	-0.000429511	3112.37	-0.00011003
3114.29	-0.00191	3114.29	-0.000427	3114.29	-0.00126	3114.29	-0.00117409	3114.29	-0.000998378	3114.29	-0.00100136	3114.29	-0.000727	3114.29	-1.04e-05	3114.29	-0.000524402	3114.29	-0.00156665	3114.29	-0.000332356	3114.29	-9.15527e-05
3116.22	-0.00196	3116.22	-0.000522	3116.22	-0.00157	3116.22	-0.000761628	3116.22	-0.000699759	3116.22	-0.00164318	3116.22	-0.000938	3116.22	-0.000263	3116.22	-0.000629246	3116.22	-0.0014813	3116.22	-0.000222325	3116.22	-0.000252247
3118.15	-0.00195	3118.15	-0.000516	3118.15	-0.00156	3118.15	-0.000193953	3118.15	-0.000773788	3118.15	-0.0018841	3118.15	-0.00103	3118.15	-0.000247	3118.15	-0.000540376	3118.15	-0.00112176	3118.15	-0.000135779	3118.15	-0.000425816
3120.08	-0.00188	3120.08	-0.00034	3120.08	-0.00131	3120.08	0.000108242	3120.08	-0.000824332	3120.08	-0.00155211	3120.08	-0.000763	3120.08	6.79e-05	3120.08	-0.000318825	3120.08	-0.000671864	3120.08	-3.09944e-05	3120.08	-0.000146985
3122.01	-0.00164	3122.01	-9.64e-05	3122.01	-0.00101	3122.01	0.000491977	3122.01	-0.000482678	3122.01	-0.00116551	3122.01	-0.000236	3122.01	0.000451	3122.01	-0.000283182	3122.01	-0.00033021	3122.01	-0.000199318	3122.01	0.000297308
3123.94	-0.00139	3123.94	-2.72e-05	3123.94	-0.000723	3123.94	0.000915766	3123.94	-8.97646e-05	3123.94	-0.00120497	3123.94	0.000181	3123.94	0.000599	3123.94	-0.000450432	3123.94	-0.00033474	3123.94	-0.000461936	3123.94	0.000276923
3125.86	-0.00126	3125.86	-0.000115	3125.86	-0.000572	3125.86	0.000806928	3125.86	-1.84774e-05	3125.86	-0.00161374	3125.86	0.000288	3125.86	0.000471	3125.86	-0.000523269	3125.86	-0.000453711	3125.86	-0.000484586	3125.86	-6.36578e-05
3127.79	-0.00121	3127.79	-0.000118	3127.79	-0.00058	3127.79	0.000357866	3127.79	8.57115e-05	3127.79	-0.00198734	3127.79	0.000173	3127.79	0.000214	3127.79	-0.000343382	3127.79	-0.000626802	3127.79	-0.000486136	3127.79	-0.000323176
3129.72	-0.00129	3129.72	-8.84e-05	3129.72	-0.000568	3129.72	0.000161648	3129.72	0.000303745	3129.72	-0.00181603	3129.72	0.000178	3129.72	0.00014	3129.72	-6.55055e-05	3129.72	-0.000854135	3129.72	-0.000536442	3129.72	-0.000367284
3131.65	-0.00147	3131.65	-0.000191	3131.65	-0.00053	3131.65	0.000332832	3131.65	0.000209928	3131.65	-0.00115895	3131.65	0.000352	3131.65	0.000322	3131.65	5.81145e-05	3131.65	-0.000605464	3131.65	-0.000443101	3131.65	-0.000157833
3133.58	-0.00152	3133.58	-0.000343	3133.58	-0.00056	3133.58	0.000766516	3133.58	0.000166535	3133.58	-0.000800848	3133.58	0.000428	3133.58	0.000402	3133.58	6.01411e-05	3133.58	6.18696e-05	3133.58	-0.000181198	3133.58	0.000193119
3135.51	-0.00136	3135.51	-0.000437	3135.51	-0.000581	3135.51	0.000966668	3135.51	0.00033021	3135.51	-0.000867486	3135.51	0.000321	3135.51	0.000237	3135.51	0.000111759	3135.51	0.000287771	3135.51	6.24657e-05	3135.51	0.000220299
3137.43	-0.00125	3137.43	-0.000586	3137.43	-0.00061	3137.43	0.000425577	3137.43	-9.05991e-06	3137.43	-0.00083518	3137.43	0.000161	3137.43	6.02e-05	3137.43	0.000118792	3137.43	7.03335e-06	3137.43	3.45707e-05	3137.43	-0.000228047
3139.36	-0.0012	3139.36	-0.000704	3139.36	-0.000708	3139.36	-0.00020802	3139.36	-0.000608087	3139.36	-0.00061667	3139.36	0.000162	3139.36	4.58e-05	3139.36	8.67844e-05	3139.36	-0.000365257	3139.36	-0.000185251	3139.36	-0.000482678
3141.29	-0.00107	3141.29	-0.000656	3141.29	-0.000835	3141.29	-1.96695e-05	3141.29	-0.000708103	3141.29	-0.000309706	3141.29	0.000235	3141.29	0.000122	3141.29	0.000167668	3141.29	-0.000761628	3141.29	-0.000201583	3141.29	-0.000328183
3143.22	-0.001	3143.22	-0.000465	3143.22	-0.000936	3143.22	0.00065279	3143.22	-0.000374675	3143.22	4.52995e-05	3143.22	0.000142	3143.22	0.00013	3143.22	0.000220239	3143.22	-0.00112677	3143.22	0.000211596	3143.22	-0.000250459
3145.15	-0.00119	3145.15	-0.000222	3145.15	-0.00098	3145.15	0.00106084	3145.15	0.00022912	3145.15	0.000219464	3145.15	1.66e-05	3145.15	9.04e-05	3145.15	0.000106752	3145.15	-0.00116324	3145.15	0.000792861	3145.15	-0.00028646
3147.08	-0.00152	3147.08	-0.000178	3147.08	-0.000972	3147.08	0.00113821	3147.08	0.000731587	3147.08	-1.01328e-05	3147.08	-3.7e-06	3147.08	8.46e-05	3147.08	-2.30074e-05	3147.08	-0.000601888	3147.08	0.00088191	3147.08	-0.000389457
3149	-0.00178	3149	-0.000487	3149	-0.000973	3149	0.00108135	3149	0.000924826	3149	-0.000468254	3149	-6.98e-05	3149	-4.55e-05	3149	-0.000120878	3149	-6.05583e-05	3149	0.000237584	3149	-0.000635385
3150.93	-0.00194	3150.93	-0.00087	3150.93	-0.00106	3150.93	0.00106037	3150.93	0.000901937	3150.93	-0.000702381	3150.93	-0.000186	3150.93	-0.000354	3150.93	-0.000283599	3150.93	-0.000314832	3150.93	-0.000606537	3150.93	-0.000711322
3152.86	-0.00196	3152.86	-0.000968	3152.86	-0.00119	3152.86	0.00120497	3152.86	0.000588536	3152.86	-0.00050056	3152.86	-0.000157	3152.86	-0.000466	3152.86	-0.000337303	3152.86	-0.000643372	3152.86	-0.00107551	3152.86	-0.000553608
3154.79	-0.00176	3154.79	-0.000853	3154.79	-0.00123	3154.79	0.0013994	3154.79	0.000110269	3154.79	-6.06775e-05	3154.79	-9.18e-05	3154.79	-0.000239	3154.79	-0.000169396	3154.79	-7.33137e-05	3154.79	-0.00100648	3154.79	-0.000496983
3156.72	-0.00146	3156.72	-0.000784	3156.72	-0.00122	3156.72	0.00158012	3156.72	0.000231981	3156.72	0.000287414	3156.72	-0.000195	3156.72	-6.69e-05	3156.72	-5.20945e-05	3156.72	0.000904679	3156.72	-0.000376821	3156.72	-0.000244737
3158.65	-0.00125	3158.65	-0.000845	3158.65	-0.00118	3158.65	0.00175357	3158.65	0.00112379	3158.65	0.000361681	3158.65	-0.000355	3158.65	-0.000192	3158.65	-5.94258e-05	3158.65	0.00134969	3158.65	0.000197411	3158.65	0.000185609
3160.57	-0.00123	3160.57	-0.00101	3160.57	-0.00118	3160.57	0.00151753	3160.57	0.00189078	3160.57	0.000266194	3160.57	-0.000243	3160.57	-0.000429	3160.57	-4.40478e-05	3160.57	0.00100935	3160.57	-8.30889e-05	3160.57	0.000329137
3162.5	-0.00137	3162.5	-0.0012	3162.5	-0.00126	3162.5	0.000705481	3162.5	0.00187528	3162.5	0.000265718	3162.5	2.35e-05	3162.5	-0.000493	3162.5	-7.75456e-05	3162.5	0.000186682	3162.5	-0.000574827	3162.5	0.000121355
3164.43	-0.0015	3164.43	-0.00128	3164.43	-0.00135	3164.43	0.000144601	3164.43	0.00133264	3164.43	0.000501156	3164.43	0.000263	3164.43	-0.000354	3164.43	-0.000194967	3164.43	-0.000391364	3164.43	-0.000450849	3164.43	3.23057e-05
3166.36	-0.00147	3166.36	-0.0012	3166.36	-0.00144	3166.36	0.000325203	3166.36	0.000905871	3166.36	0.00104308	3166.36	0.000491	3166.36	-1.57e-05	3166.36	-0.000212192	3166.36	-0.000290275	3166.36	-0.000257015	3166.36	0.000115633
3168.29	-0.00136	3168.29	-0.00113	3168.29	-0.0016	3168.29	0.000490546	3168.29	0.00106025	3168.29	0.0016588	3168.29	0.000609	3168.29	0.000342	3168.29	-5.06043e-05	3168.29	0.000111103	3168.29	-0.000495195	3168.29	0.000222921
3170.22	-0.00142	3170.22	-0.00124	3170.22	-0.00181	3170.22	0.000469565	3170.22	0.00169158	3170.22	0.00161922	3170.22	0.00058	3170.22	0.000578	3170.22	0.000283659	3170.22	0.000263095	3170.22	-0.000556707	3170.22	0.000400424
3172.15	-0.00153	3172.15	-0.00144	3172.15	-0.00178	3172.15	0.000899672	3172.15	0.00208914	3172.15	0.000675082	3172.15	0.000558	3172.15	0.0005	3172.15	0.00056231	3172.15	-6.12736e-05	3172.15	-9.26256e-05	3172.15	0.000596523
3174.07	-0.00154	3174.07	-0.00151	3174.07	-0.00165	3174.07	0.00158477	3174.07	0.00197864	3174.07	-0.000386	3174.07	0.000566	3174.07	0.000323	3174.07	0.000632703	3174.07	-0.000569344	3174.07	2.32458e-05	3174.07	0.000619412
3176	-0.00131	3176	-0.00154	3176	-0.00142	3176	0.00204146	3176	0.00182939	3176	-0.000747204	3176	0.000515	3176	0.000275	3176	0.000475705	3176	-0.000852585	3176	-0.000548124	3176	0.000436068
3177.93	-0.00112	3177.93	-0.00171	3177.93	-0.00138	3177.93	0.00198388	3177.93	0.00186539	3177.93	-0.000403285	3177.93	0.000425	3177.93	0.000307	3177.93	0.00027883	3177.93	-0.000953674	3177.93	-0.000925422	3177.93	0.000167966
3179.86	-0.00111	3179.86	-0.0019	3179.86	-0.00141	3179.86	0.00130475	3179.86	0.00208855	3179.86	-0.000170231	3179.86	0.000428	3179.86	0.000459	3179.86	0.000250638	3179.86	-0.00103176	3179.86	-0.000819325	3179.86	-1.88351e-05
3181.79	-0.00115	3181.79	-0.00209	3181.79	-0.00125	3181.79	0.000700235	3181.79	0.00233579	3181.79	-0.000342488	3181.79	0.000526	3181.79	0.000714	3181.79	0.000374079	3181.79	-0.00101519	3181.79	-0.00067246	3181.79	-5.1856e-05
3183.72	-0.00116	3183.72	-0.00231	3183.72	-0.00111	3183.72	0.000807285	3183.72	0.00218999	3183.72	-0.000640392	3183.72	0.000594	3183.72	0.000814	3183.72	0.000425577	3183.72	-0.00109684	3183.72	-0.000510096	3183.72	3.32594e-05
3185.64	-0.00115	3185.64	-0.00246	3185.64	-0.00121	3185.64	0.00123441	3185.64	0.00170791	3185.64	-0.000645399	3185.64	0.000608	3185.64	0.0007	3185.64	0.000335336	3185.64	-0.0015893	3185.64	-0.000406861	3185.64	0.000405788
3187.57	-0.00101	3187.57	-0.00238	3187.57	-0.00136	3187.57	0.00123799	3187.57	0.00155044	3187.57	-0.000296116	3187.57	0.000564	3187.57	0.000596	3187.57	0.000330329	3187.57	-0.00179708	3187.57	-0.000552297	3187.57	0.000863433
3189.5	-0.000818	3189.5	-0.00233	3189.5	-0.00144	3189.5	0.00074172	3189.5	0.00211418	3189.5	0.000152588	3189.5	0.00043	3189.5	0.000585	3189.5	0.00048852	3189.5	-0.00118899	3189.5	-0.000895977	3189.5	0.000810385
3191.43	-0.000766	3191.43	-0.00231	3191.43	-0.0014	3191.43	0.000246286	3191.43	0.00262701	3191.43	0.000587821	3191.43	0.00028	3191.43	0.00054	3191.43	0.000591099	3191.43	-0.000502825	3191.43	-0.00092423	3191.43	0.000522971
3193.36	-0.000795	3193.36	-0.0022	3193.36	-0.00124	3193.36	9.56058e-05	3193.36	0.00242305	3193.36	0.00105846	3193.36	0.00022	3193.36	0.000484	3193.36	0.000643909	3193.36	-0.000468492	3193.36	-0.000666618	3193.36	0.000577331
3195.29	-0.000786	3195.29	-0.00198	3195.29	-0.00112	3195.29	0.000199079	3195.29	0.00213838	3195.29	0.00139809	3195.29	0.000284	3195.29	0.000501	3195.29	0.00076884	3195.29	-0.000520945	3195.29	-0.000108719	3195.29	0.000714421
3197.21	-0.000814	3197.21	-0.00191	3197.21	-0.00116	3197.21	0.000285745	3197.21	0.00187087	3197.21	0.00136232	3197.21	0.000363	3197.21	0.000473	3197.21	0.000770926	3197.21	-0.00026989	3197.21	0.000378609	3197.21	0.000560284
3199.14	-0.000934	3199.14	-0.00211	3199.14	-0.00121	3199.14	0.000272393	3199.14	0.0012368	3199.14	0.00121772	3199.14	0.000308	3199.14	0.000422	3199.14	0.000520885	3199.14	-3.95775e-05	3199.14	0.000181436	3199.14	0.000241756
3201.07	-0.00103	3201.07	-0.0024	3201.07	-0.00114	3201.07	0.000274897	3201.07	0.000860214	3201.07	0.0012598	3201.07	0.000138	3201.07	0.000412	3201.07	0.000236392	3201.07	-8.22544e-05	3201.07	-0.000334978	3201.07	2.76566e-05
3203	-0.00104	3203	-0.0026	3203	-0.00104	3203	0.000331163	3203	0.000994682	3203	0.00113368	3203	-5.91e-05	3203	0.000337	3203	0.0001387	3203	-0.000338554	3203	-0.000626206	3203	5.50747e-05
3204.93	-0.000978	3204.93	-0.00261	3204.93	-0.00108	3204.93	0.000294328	3204.93	0.000995278	3204.93	0.000559449	3204.93	-0.000166	3204.93	0.000231	3204.93	0.000195742	3204.93	-0.00062108	3204.93	-0.000723481	3204.93	0.000177979
3206.86	-0.000935	3206.86	-0.00239	3206.86	-0.00116	3206.86	0.00015223	3206.86	0.000758767	3206.86	9.97782e-05	3206.86	-7.99e-05	3206.86	0.000187	3206.86	0.0002985	3206.86	-0.000440478	3206.86	-0.000739813	3206.86	9.56058e-05
3208.78	-0.000962	3208.78	-0.00211	3208.78	-0.00107	3208.78	6.98566e-05	3208.78	0.000929475	3208.78	0.000487089	3208.78	0.000125	3208.78	0.000274	3208.78	0.000416875	3208.78	0.000125051	3208.78	-0.000875235	3208.78	-0.000186682
3210.71	-0.000878	3210.71	-0.00195	3210.71	-0.00104	3210.71	-2.92063e-05	3210.71	0.00156057	3210.71	0.00129485	3210.71	0.000212	3210.71	0.000436	3210.71	0.000439704	3210.71	0.000321865	3210.71	-0.00110996	3210.71	-0.000364304
3212.64	-0.000746	3212.64	-0.00195	3212.64	-0.00116	3212.64	-0.000199676	3212.64	0.00180233	3212.64	0.0013988	3212.64	0.000134	3212.64	0.000431	3212.64	0.000240564	3212.64	-4.95911e-05	3212.64	-0.00108814	3212.64	-0.000293493
3214.57	-0.000763	3214.57	-0.00204	3214.57	-0.00119	3214.57	-0.000447154	3214.57	0.0015229	3214.57	0.000702381	3214.57	2.41e-05	3214.57	0.000254	3214.57	-3.14713e-05	3214.57	-0.000662804	3214.57	-0.000839472	3214.57	-0.000317454
3216.5	-0.000823	3216.5	-0.00221	3216.5	-0.00111	3216.5	-0.00059092	3216.5	0.00126982	3216.5	-3.05176e-05	3216.5	2.31e-05	3216.5	0.000124	3216.5	-0.000129998	3216.5	-0.00118291	3216.5	-0.00068295	3216.5	-0.000681639
3218.43	-0.000887	3218.43	-0.00248	3218.43	-0.00116	3218.43	-0.000656724	3218.43	0.00108576	3218.43	-0.000337481	3218.43	1.67e-05	3218.43	0.00017	3218.43	-0.000138104	3218.43	-0.00117695	3218.43	-0.000667691	3218.43	-0.000987887
3220.35	-0.00102	3220.35	-0.00271	3220.35	-0.00131	3220.35	-0.000751972	3220.35	0.000743151	3220.35	-0.000251293	3220.35	-6.74e-05	3220.35	0.000316	3220.35	-0.000218272	3220.35	-0.000476241	3220.35	-0.000641346	3220.35	-0.000921607
3222.28	-0.00112	3222.28	-0.00267	3222.28	-0.00134	3222.28	-0.000799418	3222.28	4.36306e-05	3222.28	-0.000230908	3222.28	-0.000141	3222.28	0.000313	3222.28	-0.000299156	3222.28	0.000310421	3222.28	-0.000486612	3222.28	-0.000654697
3224.21	-0.00106	3224.21	-0.00245	3224.21	-0.00124	3224.21	-0.000953436	3224.21	-0.000354052	3224.21	-0.000599384	3224.21	-0.000239	3224.21	0.000161	3224.21	-0.000291467	3224.21	0.000453472	3224.21	-0.000143528	3224.21	-0.000439286
3226.14	-0.000911	3226.14	-0.00229	3226.14	-0.00121	3226.14	-0.00115704	3226.14	0.000461578	3226.14	-0.000815868	3226.14	-0.000336	3226.14	9.82e-05	3226.14	-0.000260592	3226.14	-0.000311494	3226.14	8.38041e-05	3226.14	-0.000421882
3228.07	-0.000879	3228.07	-0.00231	3228.07	-0.00129	3228.07	-0.00138581	3228.07	0.00157642	3228.07	-0.000280857	3228.07	-0.000343	3228.07	8.4e-05	3228.07	-0.000420988	3228.07	-0.00143969	3228.07	-0.000143528	3228.07	-0.000638843
3230	-0.00103	3230	-0.00246	3230	-0.0014	3230	-0.00185537	3230	0.00154328	3230	0.000385523	3230	-0.000383	3230	-0.000138	3230	-0.000808775	3230	-0.00173783	3230	-0.000473738	3230	-0.000936151
3231.92	-0.00119	3231.92	-0.00256	3231.92	-0.00157	3231.92	-0.0023216	3231.92	0.000469327	3231.92	0.000367284	3231.92	-0.000549	3231.92	-0.000495	3231.92	-0.0011251	3231.92	-0.00121641	3231.92	-0.000684977	3231.92	-0.00109601
3233.85	-0.00118	3233.85	-0.00247	3233.85	-0.00164	3233.85	-0.00237632	3233.85	-0.000672221	3233.85	0.000243664	3233.85	-0.000695	3233.85	-0.000563	3233.85	-0.00109971	3233.85	-0.000816464	3233.85	-0.000766039	3233.85	-0.00116372
3235.78	-0.00101	3235.78	-0.00239	3235.78	-0.00136	3235.78	-0.00189686	3235.78	-0.00123441	3235.78	0.000593543	3235.78	-0.000753	3235.78	-0.000266	3235.78	-0.000778913	3235.78	-0.000720024	3235.78	-0.000465035	3235.78	-0.00121272
3237.71	-0.000974	3237.71	-0.00244	3237.71	-0.00101	3237.71	-0.0012778	3237.71	-0.00129187	3237.71	0.000735998	3237.71	-0.000821	3237.71	-0.000111	3237.71	-0.000472009	3237.71	-0.000984907	3237.71	-0.000142097	3237.71	-0.00107408
3239.64	-0.00109	3239.64	-0.00242	3239.64	-0.000928	3239.64	-0.000998735	3239.64	-0.00118387	3239.64	0.00026679	3239.64	-0.000901	3239.64	-0.000287	3239.64	-0.000365555	3239.64	-0.00148046	3239.64	-0.000137567	3239.64	-0.000798821
3241.57	-0.00106	3241.57	-0.00234	3241.57	-0.000954	3241.57	-0.00104606	3241.57	-0.00118279	3241.57	-0.000162244	3241.57	-0.000918	3241.57	-0.000332	3241.57	-0.000428498	3241.57	-0.00143611	3241.57	9.7394e-05	3241.57	-0.000649095
3243.49	-0.00099	3243.49	-0.00232	3243.49	-0.00101	3243.49	-0.00144482	3243.49	-0.0015285	3243.49	-0.000129104	3243.49	-0.000941	3243.49	-0.000175	3243.49	-0.00068754	3243.49	-0.000765562	3243.49	0.000555515	3243.49	-0.000596404
3245.42	-0.00108	3245.42	-0.00234	3245.42	-0.00118	3245.42	-0.00209332	3245.42	-0.00178587	3245.42	-8.14199e-05	3245.42	-0.00103	3245.42	-0.000169	3245.42	-0.00105315	3245.42	-0.000199318	3245.42	0.000275016	3245.42	-0.000605822
3247.35	-0.00106	3247.35	-0.0024	3247.35	-0.00123	3247.35	-0.0023551	3247.35	-0.00134575	3247.35	-0.000256777	3247.35	-0.00104	3247.35	-0.000161	3247.35	-0.00118697	3247.35	5.19753e-05	3247.35	-0.000495791	3247.35	-0.000788689
3249.28	-0.000776	3249.28	-0.00227	3249.28	-0.000972	3249.28	-0.00224638	3249.28	-0.000656605	3249.28	-0.000469923	3249.28	-0.000905	3249.28	4.11e-05	3249.28	-0.000938296	3249.28	0.000339866	3249.28	-0.00056088	3249.28	-0.0010314
3251.21	-0.000539	3251.21	-0.00188	3251.21	-0.000663	3251.21	-0.00232315	3251.21	-0.000153899	3251.21	-0.000728011	3251.21	-0.000776	3251.21	0.000152	3251.21	-0.000561655	3251.21	0.000633955	3251.21	0.000125527	3251.21	-0.00104272
3253.14	-0.00055	3253.14	-0.0015	3253.14	-0.000503	3253.14	-0.00221872	3253.14	0.000373602	3253.14	-0.0008322	3253.14	-0.00074	3253.14	0.00013	3253.14	-0.000504076	3253.14	0.000558734	3253.14	0.000741363	3253.14	-0.000644565
3255.06	-0.000699	3255.06	-0.0014	3255.06	-0.000583	3255.06	-0.00155115	3255.06	0.000682473	3255.06	-0.000613928	3255.06	-0.000683	3255.06	0.000108	3255.06	-0.000775933	3255.06	0.000225186	3255.06	0.000911951	3255.06	-8.34465e-05
3256.99	-0.000822	3256.99	-0.00136	3256.99	-0.000718	3256.99	-0.000785828	3256.99	0.000405788	3256.99	-0.000305772	3256.99	-0.000541	3256.99	6.66e-05	3256.99	-0.000883281	3256.99	0.000166893	3256.99	0.0006001	3256.99	8.98838e-05
3258.92	-0.000781	3258.92	-0.00115	3258.92	-0.000874	3258.92	-0.000420332	3258.92	4.31538e-05	3258.92	-0.000184536	3258.92	-0.000419	3258.92	-4.57e-05	3258.92	-0.000798762	3258.92	0.00048542	3258.92	0.00013876	3258.92	-9.9659e-05
3260.85	-0.000551	3260.85	-0.000888	3260.85	-0.000982	3260.85	-0.000644088	3260.85	5.66244e-05	3260.85	-0.000269771	3260.85	-0.000367	3260.85	-0.000161	3260.85	-0.000804961	3260.85	0.000817895	3260.85	1.29938e-05	3260.85	-0.000230074
3262.78	-0.000302	3262.78	-0.000686	3262.78	-0.000972	3262.78	-0.00090301	3262.78	0.000291705	3262.78	-0.000252008	3262.78	-0.000302	3262.78	-0.000252	3262.78	-0.000788689	3262.78	0.000855207	3262.78	0.000330687	3262.78	7.03335e-06
3264.71	-0.000297	3264.71	-0.000504	3264.71	-0.000903	3264.71	-0.00059247	3264.71	0.000496745	3264.71	-2.70605e-05	3264.71	-0.000292	3264.71	-0.000372	3264.71	-0.000616193	3264.71	0.00048399	3264.71	0.000647306	3264.71	0.000297308
3266.63	-0.000479	3266.63	-0.000413	3266.63	-0.000985	3266.63	-0.000183106	3266.63	0.000745893	3266.63	-8.9407e-06	3266.63	-0.00047	3266.63	-0.000471	3266.63	-0.000480652	3266.63	-0.000144124	3266.63	0.00042963	3266.63	9.36985e-05
3268.56	-0.000814	3268.56	-0.000488	3268.56	-0.00113	3268.56	-0.000429273	3268.56	0.000967503	3268.56	-0.000551701	3268.56	-0.00069	3268.56	-0.000484	3268.56	-0.000609875	3268.56	-0.000535846	3268.56	-4.64916e-06	3268.56	-0.000413656
3270.49	-0.00103	3270.49	-0.000507	3270.49	-0.001	3270.49	-0.00130427	3270.49	0.0010258	3270.49	-0.00109899	3270.49	-0.000735	3270.49	-0.000392	3270.49	-0.000810921	3270.49	-0.000356555	3270.49	0.000164986	3270.49	-0.000527859
3272.42	-0.000917	3272.42	-0.000335	3272.42	-0.000618	3272.42	-0.00184083	3272.42	0.000958919	3272.42	-0.00074029	3272.42	-0.000703	3272.42	-0.000261	3272.42	-0.000821531	3272.42	0.000380874	3272.42	0.00068295	3272.42	-0.000135183
3274.35	-0.00078	3274.35	-0.000132	3274.35	-0.000426	3274.35	-0.00115812	3274.35	0.000532508	3274.35	0.000119209	3274.35	-0.000696	3274.35	-0.000173	3274.35	-0.000740588	3274.35	0.000984073	3274.35	0.000738025	3274.35	0.000160336
3276.28	-0.000794	3276.28	9.12e-06	3276.28	-0.000507	3276.28	0.000222802	3276.28	-0.000281572	3276.28	0.000601768	3276.28	-0.000595	3276.28	-0.00013	3276.28	-0.000690639	3276.28	0.00101745	3276.28	0.00042057	3276.28	0.000182629
3278.2	-0.00078	3278.2	0.000123	3278.2	-0.000649	3278.2	0.000842929	3278.2	-0.000669718	3278.2	0.000871897	3278.2	-0.000367	3278.2	-0.000188	3278.2	-0.000735223	3278.2	0.000874042	3278.2	0.000191331	3278.2	0.000420332
3280.13	-0.000702	3280.13	0.000328	3280.13	-0.000753	3280.13	0.00014317	3280.13	-0.000396967	3280.13	0.000959039	3280.13	-0.000127	3280.13	-0.000313	3280.13	-0.000816166	3280.13	0.00103116	3280.13	0.000240922	3280.13	0.000885963
3282.06	-0.000631	3282.06	0.000672	3282.06	-0.000751	3282.06	-0.000905037	3282.06	-0.000111341	3282.06	0.000528216	3282.06	-1.7e-05	3282.06	-0.000421	3282.06	-0.000711679	3282.06	0.00113618	3282.06	0.000474334	3282.06	0.00102091
3283.99	-0.000585	3283.99	0.000943	3283.99	-0.000688	3283.99	-0.00140977	3283.99	5.96046e-07	3283.99	0.00015235	3283.99	-5.97e-05	3283.99	-0.000432	3283.99	-0.000435233	3283.99	0.000899196	3283.99	0.000733137	3283.99	0.000830293
3285.92	-0.00054	3285.92	0.00103	3285.92	-0.000665	3285.92	-0.00145364	3285.92	0.000334978	3285.92	0.000400305	3285.92	-5.03e-05	3285.92	-0.000209	3285.92	-0.000180125	3285.92	0.000654697	3285.92	0.00101781	3285.92	0.000707984
3287.85	-0.00052	3287.85	0.00108	3287.85	-0.00077	3287.85	-0.00118482	3287.85	0.000917912	3287.85	0.00073123	3287.85	-1.14e-05	3287.85	3e-05	3287.85	-2.77162e-05	3287.85	0.000400782	3287.85	0.0010916	3287.85	0.000521898
3289.77	-0.000667	3289.77	0.00112	3289.77	-0.00103	3289.77	-0.000834703	3289.77	0.000872135	3289.77	0.000620961	3289.77	-0.000204	3289.77	-5.08e-05	3289.77	-6.97374e-05	3289.77	-2.77758e-05	3289.77	0.000691175	3289.77	0.000231743
3291.7	-0.000935	3291.7	0.000945	3291.7	-0.00126	3291.7	-0.000822783	3291.7	8.7142e-05	3291.7	0.000347018	3291.7	-0.000559	3291.7	-0.000322	3291.7	-0.000321269	3291.7	-0.000358224	3291.7	0.000124931	3291.7	0.000192523
3293.63	-0.00104	3293.63	0.001	3293.63	-0.00131	3293.63	-0.000835895	3293.63	-0.000260353	3293.63	0.000314474	3293.63	-0.000746	3293.63	-0.000458	3293.63	-0.000621259	3293.63	-0.000395298	3293.63	-0.000115275	3293.63	0.000530958
3295.56	-0.000956	3295.56	0.00127	3295.56	-0.00117	3295.56	-0.00060904	3295.56	0.000124812	3295.56	0.000466824	3295.56	-0.000597	3295.56	-0.000344	3295.56	-0.000828862	3295.56	-0.000171781	3295.56	-3.93391e-06	3295.56	0.00100064
3297.49	-0.000896	3297.49	0.00132	3297.49	-0.000955	3297.49	-0.000908971	3297.49	0.000705123	3297.49	0.000527144	3297.49	-0.000195	3297.49	-9.78e-05	3297.49	-0.000806689	3297.49	0.000479341	3297.49	0.000229835	3297.49	0.0011934
3299.42	-0.000974	3299.42	0.00107	3299.42	-0.000851	3299.42	-0.00177968	3299.42	0.00126827	3299.42	0.000546932	3299.42	0.000214	3299.42	1.65e-05	3299.42	-0.000619412	3299.42	0.00115573	3299.42	0.000570774	3299.42	0.00108123
3301.34	-0.00106	3301.34	0.00083	3301.34	-0.00105	3301.34	-0.002159	3301.34	0.00144923	3301.34	0.000653624	3301.34	0.000341	3301.34	-0.000141	3301.34	-0.000596106	3301.34	0.00066328	3301.34	0.000901103	3301.34	0.000865817
3303.27	-0.00103	3303.27	0.00068	3303.27	-0.00132	3303.27	-0.00183976	3303.27	0.000993371	3303.27	0.00045383	3303.27	6.71e-05	3303.27	-0.000474	3303.27	-0.000757277	3303.27	-0.000377178	3303.27	0.000851512	3303.27	0.00052619
3305.2	-0.00107	3305.2	0.000607	3305.2	-0.0012	3305.2	-0.00147319	3305.2	0.000678062	3305.2	-7.67708e-05	3305.2	-0.000315	3305.2	-0.00087	3305.2	-0.000802934	3305.2	-0.000170827	3305.2	0.000617862	3305.2	0.000337839
3307.13	-0.00132	3307.13	0.000662	3307.13	-0.000734	3307.13	-0.00148487	3307.13	0.00092566	3307.13	-0.000281453	3307.13	-0.000372	3307.13	-0.00117	3307.13	-0.000632465	3307.13	0.000716209	3307.13	0.000623584	3307.13	0.000717401
3309.06	-0.00153	3309.06	0.000822	3309.06	-0.00034	3309.06	-0.00161982	3309.06	0.00109673	3309.06	-0.000104904	3309.06	-6.84e-05	3309.06	-0.00116	3309.06	-0.000311911	3309.06	0.00106704	3309.06	0.000531793	3309.06	0.00130177
3310.99	-0.00141	3310.99	0.000947	3310.99	-0.000177	3310.99	-0.00156963	3310.99	0.00102615	3310.99	0.000123501	3310.99	0.00026	3310.99	-0.000839	3310.99	5.43594e-05	3310.99	0.00121462	3310.99	0.000126243	3310.99	0.00126815
3312.92	-0.00112	3312.92	0.000839	3312.92	-0.000274	3312.92	-0.00179136	3312.92	0.000665903	3312.92	0.00016284	3312.92	0.00038	3312.92	-0.000389	3312.92	0.000176907	3312.92	0.000973463	3312.92	-0.000263572	3312.92	0.000736713
3314.84	-0.000958	3314.84	0.000702	3314.84	-0.000552	3314.84	-0.0023216	3314.84	0.000275373	3314.84	-1.54972e-05	3314.84	0.000405	3314.84	-4.22e-05	3314.84	-1.95503e-05	3314.84	0.000414729	3314.84	-0.000434875	3314.84	0.00063312
3316.77	-0.00104	3316.77	0.00101	3316.77	-0.000772	3316.77	-0.00241077	3316.77	9.05991e-05	3316.77	2.36034e-05	3316.77	0.000442	3316.77	-5.07e-05	3316.77	-0.000134945	3316.77	-6.40154e-05	3316.77	-0.000202537	3316.77	0.00100839
3318.7	-0.00125	3318.7	0.00136	3318.7	-0.000824	3318.7	-0.00182509	3318.7	0.000134468	3318.7	0.000250936	3318.7	0.00041	3318.7	-0.000342	3318.7	-5.00083e-05	3318.7	-0.000205874	3318.7	0.000282764	3318.7	0.00132525
3320.63	-0.00133	3320.63	0.00126	3320.63	-0.000772	3320.63	-0.000948906	3320.63	0.000397682	3320.63	0.00061655	3320.63	0.000264	3320.63	-0.000538	3320.63	-8.03471e-05	3320.63	3.60012e-05	3320.63	0.000425816	3320.63	0.00151658
3322.56	-0.00122	3322.56	0.000818	3322.56	-0.000778	3322.56	-0.000213504	3322.56	0.000636578	3322.56	0.00125766	3322.56	3.24e-05	3322.56	-0.000351	3322.56	-0.000229716	3322.56	0.000277519	3322.56	0.000148296	3322.56	0.00143838
3324.49	-0.00127	3324.49	0.000525	3324.49	-0.000879	3324.49	0.000199199	3324.49	0.000510931	3324.49	0.00144351	3324.49	-0.00013	3324.49	-6.07e-05	3324.49	-0.000314593	3324.49	0.00020957	3324.49	-0.000163317	3324.49	0.00110638
3326.41	-0.0012	3326.41	0.00065	3326.41	-0.000865	3326.41	0.000222564	3326.41	0.000354171	3326.41	0.00098908	3326.41	-6.37e-05	3326.41	9.86e-05	3326.41	-0.000434875	3326.41	0.000264764	3326.41	-0.000338316	3326.41	0.000977874
3328.34	-0.000911	3328.34	0.000937	3328.34	-0.000738	3328.34	-3.27825e-05	3328.34	0.000442505	3328.34	0.000718951	3328.34	5.61e-05	3328.34	3.17e-05	3328.34	-0.000678003	3328.34	0.000837803	3328.34	-0.000209808	3328.34	0.00107694
3330.27	-0.000782	3330.27	0.00101	3330.27	-0.000712	3330.27	-0.000446081	3330.27	0.000246525	3330.27	0.000557065	3330.27	-8.29e-06	3330.27	0.000147	3330.27	-0.000871837	3330.27	0.00140381	3330.27	0.00012064	3330.27	0.00123072
3332.2	-0.000859	3332.2	0.000967	3332.2	-0.000806	3332.2	-0.00048542	3332.2	6.41346e-05	3332.2	-9.81092e-05	3332.2	-7.56e-05	3332.2	0.000539	3332.2	-0.000781536	3332.2	0.00151265	3332.2	0.000342369	3332.2	0.00144219
3334.13	-0.000941	3334.13	0.00094	3334.13	-0.000992	3334.13	-0.000321508	3334.13	0.000122786	3334.13	-0.000784993	3334.13	2.41e-05	3334.13	0.000652	3334.13	-0.000427604	3334.13	0.00153983	3334.13	0.000308871	3334.13	0.00164068
3336.06	-0.000992	3336.06	0.000748	3336.06	-0.00131	3336.06	-0.000308752	3336.06	0.000263691	3336.06	-0.00110495	3336.06	6.43e-05	3336.06	0.000349	3336.06	-0.000467896	3336.06	0.00153029	3336.06	0.000244498	3336.06	0.00173795
3337.98	-0.000931	3337.98	0.000589	3337.98	-0.00161	3337.98	-0.000211954	3337.98	-5.34058e-05	3337.98	-0.000751853	3337.98	-7.15e-05	3337.98	1.75e-05	3337.98	-0.000697911	3337.98	0.00112832	3337.98	7.04527e-05	3337.98	0.00134158
3339.91	-0.000701	3339.91	0.000695	3339.91	-0.00147	3339.91	-0.00014472	3339.91	-0.000456929	3339.91	8.51154e-05	3339.91	-0.0001	3339.91	-0.000161	3339.91	-0.000615478	3339.91	0.000684023	3339.91	-0.000305533	3339.91	0.000333309
3341.84	-0.000476	3341.84	0.000804	3341.84	-0.00115	3341.84	-0.000431895	3341.84	-0.000167489	3341.84	0.000648737	3341.84	-8.99e-05	3341.84	-0.000176	3341.84	-0.000355661	3341.84	0.000501156	3341.84	-0.000711322	3341.84	-0.000237465
3343.77	-0.000394	3343.77	0.000755	3343.77	-0.00086	3343.77	-0.000590682	3343.77	0.000768304	3343.77	0.000801325	3343.77	4.53e-05	3343.77	1.87e-05	3343.77	-7.00355e-05	3343.77	0.000259042	3343.77	-0.00055635	3343.77	0.000285387
3345.7	-0.000435	3345.7	0.000708	3345.7	-0.000753	3345.7	-0.000558376	3345.7	0.00114965	3345.7	0.000934005	3345.7	0.000262	3345.7	0.000315	3345.7	0.000291288	3345.7	0.000128388	3345.7	0.000114441	3345.7	0.00103283
3347.63	-0.000556	3347.63	0.000699	3347.63	-0.000777	3347.63	-0.000849009	3347.63	0.000613213	3347.63	0.000864983	3347.63	0.000267	3347.63	0.000449	3347.63	0.000449538	3347.63	0.000503421	3347.63	0.000333309	3347.63	0.00114512
3349.55	-0.000717	3349.55	0.000567	3349.55	-0.000701	3349.55	-0.0010879	3349.55	0.000346065	3349.55	0.000522375	3349.55	-3.44e-05	3349.55	0.000346	3349.55	0.000258982	3349.55	0.00102317	3349.55	3.89814e-05	3349.55	0.000671387
3351.48	-0.000773	3351.48	0.000388	3351.48	-0.00048	3351.48	-0.00100958	3351.48	0.000726819	3351.48	0.000444055	3351.48	-0.000264	3351.48	0.000296	3351.48	0.000133812	3351.48	0.00127626	3351.48	6.78301e-05	3351.48	4.87566e-05
3353.41	-0.000614	3353.41	0.000453	3353.41	-0.000387	3353.41	-0.000859022	3353.41	0.00097692	3353.41	0.000816226	3353.41	-0.000187	3353.41	0.000522	3353.41	0.000307918	3353.41	0.0011375	3353.41	0.000548959	3353.41	-0.000359178
3355.34	-0.000464	3355.34	0.000654	3355.34	-0.000417	3355.34	-0.000398755	3355.34	0.000653267	3355.34	0.00109065	3355.34	-8.49e-05	3355.34	0.000727	3355.34	0.000516713	3355.34	0.000484824	3355.34	0.00105131	3355.34	-0.000354648
3357.27	-0.000522	3357.27	0.000622	3357.27	-0.000329	3357.27	2.11e-05	3357.27	0.00016582	3357.27	0.00111544	3357.27	-0.00012	3357.27	0.000608	3357.27	0.000594616	3357.27	-0.000412583	3357.27	0.00118625	3357.27	-0.000317931
3359.2	-0.000637	3359.2	0.00036	3359.2	-0.000229	3359.2	-0.000436425	3359.2	3.79086e-05	3359.2	0.00108612	3359.2	-0.000114	3359.2	0.00045	3359.2	0.00058502	3359.2	-0.000745058	3359.2	0.000765681	3359.2	-0.000336289
3361.12	-0.000761	3361.12	0.000141	3361.12	-0.000224	3361.12	-0.00126767	3361.12	0.000485182	3361.12	0.000914097	3361.12	5.25e-06	3361.12	0.000572	3361.12	0.0005458	3361.12	-0.000516295	3361.12	0.000244141	3361.12	-0.000363112
3363.05	-0.00106	3363.05	3.55e-05	3363.05	-0.000252	3363.05	-0.00144255	3363.05	0.0014348	3363.05	0.000909805	3363.05	0.000123	3363.05	0.000691	3363.05	0.000415683	3363.05	-0.000442386	3363.05	0.000137329	3363.05	-0.000248074
3364.98	-0.00147	3364.98	-8.74e-05	3364.98	-0.00045	3364.98	-0.00121045	3364.98	0.0021081	3364.98	0.00101876	3364.98	2.74e-05	3364.98	0.000455	3364.98	5.96046e-05	3364.98	-0.000617742	3364.98	0.000224471	3364.98	0.000108957
3366.91	-0.00158	3366.91	-0.000377	3366.91	-0.000693	3366.91	-0.00128257	3366.91	0.00150418	3366.91	0.000679493	3366.91	-0.00028	3366.91	8.06e-05	3366.91	-0.000329077	3366.91	-0.000342727	3366.91	3.91006e-05	3366.91	0.000317454
3368.84	-0.00121	3368.84	-0.000745	3368.84	-0.000493	3368.84	-0.0014981	3368.84	6.00815e-05	3368.84	0.000383019	3368.84	-0.000446	3368.84	-5.35e-05	3368.84	-0.000418901	3368.84	0.000324488	3368.84	-0.000518084	3368.84	0.000149846
3370.77	-0.000705	3370.77	-0.000808	3370.77	-0.000155	3370.77	-0.00163627	3370.77	-0.00103652	3370.77	0.000670791	3370.77	-0.000354	3370.77	6.62e-05	3370.77	-0.000172794	3370.77	0.000923872	3370.77	-0.00108647	3370.77	0.000147581
3372.69	-0.000443	3372.69	-0.000577	3372.69	-8.6e-05	3372.69	-0.00186205	3372.69	-0.00125921	3372.69	0.00103319	3372.69	-0.000235	3372.69	0.00018	3372.69	8.98838e-05	3372.69	0.0016377	3372.69	-0.00133646	3372.69	0.000391603
3374.62	-0.000421	3374.62	-0.000524	3374.62	-0.000398	3374.62	-0.00178707	3374.62	-0.000879765	3374.62	0.000994086	3374.62	-0.000172	3374.62	0.000205	3374.62	-1.03712e-05	3374.62	0.00216818	3374.62	-0.00126934	3374.62	0.000403523
3376.55	-0.000558	3376.55	-0.000723	3376.55	-0.000696	3376.55	-0.00108373	3376.55	-0.000431776	3376.55	0.000660777	3376.55	-0.000136	3376.55	0.000302	3376.55	-0.000340342	3376.55	0.00193608	3376.55	-0.00102758	3376.55	0.000307798
3378.48	-0.000826	3378.48	-0.000923	3378.48	-0.000909	3378.48	-0.000521183	3378.48	-0.000268102	3378.48	0.000482798	3378.48	-0.000173	3378.48	0.00039	3378.48	-0.000534296	3378.48	0.00111866	3378.48	-0.000949144	3378.48	0.000430465
3380.41	-0.00104	3380.41	-0.00105	3380.41	-0.00081	3380.41	-0.000617385	3380.41	-0.000418782	3380.41	0.000640512	3380.41	-0.000133	3380.41	0.000352	3380.41	-0.000519931	3380.41	0.000399709	3380.41	-0.00109589	3380.41	0.000731707
3382.34	-0.00104	3382.34	-0.00112	3382.34	-0.000606	3382.34	-0.000905514	3382.34	-0.0006392	3382.34	0.000709891	3382.34	9.14e-05	3382.34	0.000304	3382.34	-0.000360251	3382.34	0.00029254	3382.34	-0.000960589	3382.34	0.000994444
3384.26	-0.000934	3384.26	-0.00118	3384.26	-0.000397	3384.26	-0.00102913	3384.26	-0.000785947	3384.26	0.000433564	3384.26	6.4e-05	3384.26	0.0002	3384.26	-0.00014919	3384.26	0.000355601	3384.26	-0.00035739	3384.26	0.000820875
3386.19	-0.000843	3386.19	-0.00131	3386.19	-0.000332	3386.19	-0.000850439	3386.19	-0.000905752	3386.19	-6.67572e-05	3386.19	-0.000489	3386.19	-6.74e-05	3386.19	-3.00407e-05	3386.19	-0.00010097	3386.19	6.63996e-05	3386.19	0.000244617
3388.12	-0.000904	3388.12	-0.00151	3388.12	-0.000348	3388.12	-0.000490427	3388.12	-0.0010618	3388.12	-0.000349641	3388.12	-0.000996	3388.12	-0.000352	3388.12	-1.19209e-05	3388.12	-0.000704408	3388.12	-0.000211239	3388.12	-4.55379e-05
3390.05	-0.00106	3390.05	-0.00174	3390.05	-0.00038	3390.05	-0.000437379	3390.05	-0.000970721	3390.05	8.83341e-05	3390.05	-0.00102	3390.05	-0.000433	3390.05	-2.5034e-06	3390.05	-0.000640392	3390.05	-0.000722766	3390.05	0.000115275
3391.98	-0.00112	3391.98	-0.00184	3391.98	-0.000334	3391.98	-0.000801802	3391.98	-0.000440478	3391.98	0.000626922	3391.98	-0.000847	3391.98	-0.000334	3391.98	-6.49095e-05	3391.98	4.23193e-05	3391.98	-0.00106514	3391.98	0.000367761
3393.91	-0.00102	3393.91	-0.00178	3393.91	-4.58e-05	3393.91	-0.00114047	3393.91	-0.000128627	3393.91	0.000452161	3393.91	-0.000618	3393.91	-0.000195	3393.91	-0.000233352	3393.91	0.000660181	3393.91	-0.00117886	3393.91	0.000583172
3395.83	-0.000939	3395.83	-0.0018	3395.83	0.000279	3395.83	-0.000994205	3395.83	-0.000663519	3395.83	-1.46627e-05	3395.83	-0.000416	3395.83	-7.56e-05	3395.83	-0.000454843	3395.83	0.000850678	3395.83	-0.00101542	3395.83	0.000527978
3397.76	-0.00112	3397.76	-0.002	3397.76	0.000314	3397.76	-0.000735164	3397.76	-0.00167227	3397.76	-0.00042069	3397.76	-0.000594	3397.76	-0.000155	3397.76	-0.000740051	3397.76	0.000499725	3397.76	-0.000647783	3397.76	9.53674e-05
3399.69	-0.0013	3399.69	-0.00212	3399.69	-7.11e-05	3399.69	-0.0011065	3399.69	-0.0020113	3399.69	-0.000773788	3399.69	-0.000916	3399.69	-0.00044	3399.69	-0.000912964	3399.69	-0.000189543	3399.69	-0.00031364	3399.69	-0.00028491
3401.62	-0.00111	3401.62	-0.0019	3401.62	-0.00024	3401.62	-0.00177121	3401.62	-0.0012455	3401.62	-0.000546336	3401.62	-0.000864	3401.62	-0.000638	3401.62	-0.000762641	3401.62	-0.000457645	3401.62	-0.000154853	3401.62	-0.00043571
3403.55	-0.000805	3403.55	-0.00152	3403.55	-0.000194	3403.55	-0.00206018	3403.55	-0.000428557	3403.55	0.000426889	3403.55	-0.000617	3403.55	-0.000738	3403.55	-0.000407338	3403.55	4.80413e-05	3403.55	-0.000218272	3403.55	-0.000573635
3405.48	-0.000509	3405.48	-0.00142	3405.48	-0.000138	3405.48	-0.00208747	3405.48	-0.000476599	3405.48	0.00125992	3405.48	-0.000566	3405.48	-0.000788	3405.48	-0.000114202	3405.48	0.000719667	3405.48	-0.000496149	3405.48	-0.000456572
3407.4	-0.000236	3407.4	-0.00171	3407.4	-9.4e-05	3407.4	-0.00217807	3407.4	-0.00102663	3407.4	0.0013535	3407.4	-0.000733	3407.4	-0.000617	3407.4	-3.69549e-05	3407.4	0.00106358	3407.4	-0.000709772	3407.4	0.000136495
3409.33	-0.000161	3409.33	-0.00197	3409.33	-2.46e-05	3409.33	-0.00216305	3409.33	-0.0012418	3409.33	0.000872731	3409.33	-0.000904	3409.33	-0.000335	3409.33	-0.00015074	3409.33	0.00120747	3409.33	-0.000539422	3409.33	0.000547171
3411.26	-0.00011	3411.26	-0.00184	3411.26	-2.12e-05	3411.26	-0.00169814	3411.26	-0.00106668	3411.26	-0.000112057	3411.26	-0.000836	3411.26	-0.000151	3411.26	-0.000226676	3411.26	0.00139928	3411.26	-0.000207782	3411.26	0.000414252
3413.19	0.00017	3413.19	-0.00153	3413.19	-3.31e-05	3413.19	-0.00132716	3413.19	-0.00093627	3413.19	-0.00121033	3413.19	-0.000527	3413.19	2.67e-05	3413.19	-9.9659e-05	3413.19	0.00182772	3413.19	-0.00024128	3413.19	0.000273705
3415.12	0.000565	3415.12	-0.00136	3415.12	0.000115	3415.12	-0.00164998	3415.12	-0.000369787	3415.12	-0.00135624	3415.12	-0.000186	3415.12	0.000201	3415.12	0.00019443	3415.12	0.00220919	3415.12	-0.000690103	3415.12	0.00036633
3417.05	0.000979	3417.05	-0.00125	3417.05	0.000398	3417.05	-0.00204647	3417.05	0.000558019	3417.05	-0.000169039	3417.05	0.000117	3417.05	0.000282	3417.05	0.00059098	3417.05	0.00199914	3417.05	-0.00102723	3417.05	0.000577688
3418.97	0.0013	3418.97	-0.00116	3418.97	0.000538	3418.97	-0.00195217	3418.97	0.000963688	3418.97	0.000893474	3418.97	0.000319	3418.97	0.000329	3418.97	0.000813365	3418.97	0.0014832	3418.97	-0.00103235	3418.97	0.000917435
3420.9	0.00141	3420.9	-0.00115	3420.9	0.000359	3420.9	-0.00174785	3420.9	0.000590563	3420.9	0.000759363	3420.9	0.000274	3420.9	0.000348	3420.9	0.000721335	3420.9	0.00115395	3420.9	-0.00108182	3420.9	0.00111818
3422.83	0.00136	3422.83	-0.00115	3422.83	3.21e-05	3422.83	-0.00171638	3422.83	1.95503e-05	3422.83	0.000353694	3422.83	0.000219	3422.83	0.000287	3422.83	0.000650048	3422.83	0.00109112	3422.83	-0.00119567	3422.83	0.000810742
3424.76	0.00123	3424.76	-0.00107	3424.76	-0.000154	3424.76	-0.00139868	3424.76	8.2016e-05	3424.76	0.000348329	3424.76	0.000289	3424.76	0.00019	3424.76	0.000784814	3424.76	0.00120282	3424.76	-0.000917196	3424.76	0.000274658
3426.69	0.00118	3426.69	-0.00102	3426.69	-0.000187	3426.69	-0.000724196	3426.69	0.000836849	3426.69	0.000320435	3426.69	0.000217	3426.69	9.19e-05	3426.69	0.000876427	3426.69	0.00117564	3426.69	-0.000376701	3426.69	0.000116825
3428.62	0.00131	3428.62	-0.00109	3428.62	-0.000265	3428.62	-0.000422597	3428.62	0.00108564	3428.62	0.000356913	3428.62	7.39e-05	3428.62	-1.91e-05	3428.62	0.000742972	3428.62	0.000663877	3428.62	-0.00022316	3428.62	0.000544786
3430.54	0.0014	3430.54	-0.00126	3430.54	-0.000387	3430.54	-0.000823379	3430.54	0.000448942	3430.54	0.000788569	3430.54	5.92e-05	3430.54	-0.000146	3430.54	0.000479341	3430.54	0.000136614	3430.54	-0.000396013	3430.54	0.00119483
3432.47	0.00132	3432.47	-0.00144	3432.47	-0.000433	3432.47	-0.00161469	3432.47	-0.000165343	3432.47	0.00118697	3432.47	1.23e-05	3432.47	-0.000181	3432.47	0.000290275	3432.47	7.80821e-05	3432.47	-0.000368834	3432.47	0.00158751
3434.4	0.0013	3434.4	-0.00145	3434.4	-0.00042	3434.4	-0.00229263	3434.4	-0.000273824	3434.4	0.00106263	3434.4	-1.51e-05	3434.4	-5.71e-05	3434.4	0.000305235	3434.4	0.000190616	3434.4	-0.000136733	3434.4	0.00177753
3436.33	0.00168	3436.33	-0.00114	3436.33	-0.000357	3436.33	-0.00232029	3436.33	-8.16584e-05	3436.33	0.00111079	3436.33	0.000241	3436.33	0.000252	3436.33	0.000563681	3436.33	0.000517964	3436.33	0.000230193	3436.33	0.00200033
3438.26	0.00241	3438.26	-0.000585	3438.26	-0.000168	3438.26	-0.00142574	3438.26	0.000244021	3438.26	0.00177956	3438.26	0.000686	3438.26	0.000543	3438.26	0.00114435	3438.26	0.00117457	3438.26	0.000699401	3438.26	0.00211036
3440.19	0.00312	3440.19	-4.88e-05	3440.19	4.35e-05	3440.19	-0.00052774	3440.19	0.00078404	3440.19	0.00206721	3440.19	0.00102	3440.19	0.000858	3440.19	0.0017544	3440.19	0.00146449	3440.19	0.000922203	3440.19	0.00195444
3442.12	0.00352	3442.12	0.000235	3442.12	0.000169	3442.12	-0.000157833	3442.12	0.00149536	3442.12	0.00169516	3442.12	0.00125	3442.12	0.00135	3442.12	0.00204533	3442.12	0.00117469	3442.12	0.000977159	3442.12	0.00192809
3444.04	0.00365	3444.04	0.000369	3444.04	0.000541	3444.04	0.000244737	3444.04	0.00211608	3444.04	0.00137425	3444.04	0.00147	3444.04	0.0018	3444.04	0.00219673	3444.04	0.00106347	3444.04	0.00128508	3444.04	0.00244594
3445.97	0.00369	3445.97	0.000367	3445.97	0.000783	3445.97	0.000642896	3445.97	0.00180638	3445.97	0.00106204	3445.97	0.00151	3445.97	0.00179	3445.97	0.00197399	3445.97	0.00115883	3445.97	0.00149476	3445.97	0.00283277
3447.9	0.00388	3447.9	0.00023	3447.9	0.000784	3447.9	0.000448108	3447.9	0.000200629	3447.9	0.000695705	3447.9	0.00133	3447.9	0.00157	3447.9	0.00135535	3447.9	0.000885725	3447.9	0.00116527	3447.9	0.00251889
3449.83	0.00424	3449.83	0.0003	3449.83	0.000957	3449.83	-0.000121593	3449.83	-0.000896931	3449.83	0.000744462	3449.83	0.00122	3449.83	0.00177	3449.83	0.00123042	3449.83	0.000589252	3449.83	0.000567913	3449.83	0.0021919
3451.76	0.00453	3451.76	0.000623	3451.76	0.00141	3451.76	-0.000683665	3451.76	-0.000448942	3451.76	0.00106013	3451.76	0.00112	3451.76	0.00204	3451.76	0.00161415	3451.76	0.000598431	3451.76	5.81741e-05	3451.76	0.00210464
3453.69	0.00472	3453.69	0.000925	3453.69	0.00179	3453.69	-0.00106287	3453.69	0.000287056	3453.69	0.00111556	3453.69	0.00091	3453.69	0.00213	3453.69	0.00189155	3453.69	0.000628114	3453.69	-0.00014627	3453.69	0.00186694
3455.61	0.00489	3455.61	0.00113	3455.61	0.00194	3455.61	-0.000988483	3455.61	0.000659347	3455.61	0.000852585	3455.61	0.000876	3455.61	0.00243	3455.61	0.00200743	3455.61	0.000681639	3455.61	0.000136137	3455.61	0.00137711
3457.54	0.00495	3457.54	0.00144	3457.54	0.0022	3457.54	-0.0004462	3457.54	0.00101686	3457.54	0.000629544	3457.54	0.001	3457.54	0.00286	3457.54	0.00210536	3457.54	0.000730634	3457.54	0.000485897	3457.54	0.00084281
3459.47	0.00507	3459.47	0.0018	3459.47	0.00273	3459.47	-0.000258088	3459.47	0.00113463	3459.47	0.000772476	3459.47	0.00102	3459.47	0.00308	3459.47	0.00218809	3459.47	0.000526428	3459.47	0.000460982	3459.47	0.000727892
3461.4	0.00539	3461.4	0.00202	3461.4	0.00323	3461.4	-0.000729561	3461.4	0.000540376	3461.4	0.00110567	3461.4	0.00103	3461.4	0.00293	3461.4	0.00212675	3461.4	0.000312209	3461.4	0.000261545	3461.4	0.00116015
3463.33	0.00576	3463.33	0.00198	3463.33	0.00336	3463.33	-0.000706434	3463.33	-0.000617623	3463.33	0.00122213	3463.33	0.00109	3463.33	0.00253	3463.33	0.00181419	3463.33	0.000366211	3463.33	0.000464201	3463.33	0.00167358
3465.26	0.00601	3465.26	0.00194	3465.26	0.00328	3465.26	0.000180006	3465.26	-0.0013783	3465.26	0.000863552	3465.26	0.00116	3465.26	0.00222	3465.26	0.00154424	3465.26	0.000340462	3465.26	0.000886798	3465.26	0.00178838
3467.18	0.0062	3467.18	0.00209	3467.18	0.00343	3467.18	0.00078249	3467.18	-0.00130534	3467.18	0.00014174	3467.18	0.00133	3467.18	0.00222	3467.18	0.00166964	3467.18	0.000112414	3467.18	0.000897765	3467.18	0.00138104
3469.11	0.00652	3469.11	0.00248	3469.11	0.00398	3469.11	0.000674009	3469.11	-0.000638962	3469.11	-0.000228047	3469.11	0.00157	3469.11	0.00249	3469.11	0.00208819	3469.11	-0.000101209	3469.11	0.000673532	3469.11	0.000834346
3471.04	0.00702	3471.04	0.00316	3471.04	0.0046	3471.04	0.000766039	3471.04	0.000723839	3471.04	1.8239e-05	3471.04	0.00168	3471.04	0.00281	3471.04	0.00251854	3471.04	6.12736e-05	3471.04	0.000532031	3471.04	0.000638962
3472.97	0.00751	3472.97	0.00386	3472.97	0.00491	3472.97	0.00101614	3472.97	0.00183213	3472.97	0.00041461	3472.97	0.00172	3472.97	0.00304	3472.97	0.00270206	3472.97	0.000481725	3472.97	0.000443459	3472.97	0.000860453
3474.9	0.00797	3474.9	0.00436	3474.9	0.00505	3474.9	0.000510096	3474.9	0.00161731	3474.9	0.000623584	3474.9	0.00183	3474.9	0.00311	3474.9	0.00257444	3474.9	0.000840902	3474.9	0.000614882	3474.9	0.00120211
3476.83	0.0085	3476.83	0.00483	3476.83	0.00559	3476.83	-3.27825e-05	3476.83	0.00118744	3476.83	0.000799894	3476.83	0.00198	3476.83	0.00307	3476.83	0.00246203	3476.83	0.000942945	3476.83	0.00125814	3476.83	0.00138652
3478.75	0.00904	3478.75	0.00544	3478.75	0.00664	3478.75	0.000513434	3478.75	0.00146937	3478.75	0.00142777	3478.75	0.00209	3478.75	0.00317	3478.75	0.00255603	3478.75	0.00066793	3478.75	0.00207281	3478.75	0.00153768
3480.68	0.00964	3480.68	0.00604	3480.68	0.00764	3480.68	0.00144017	3480.68	0.00166523	3480.68	0.00215459	3480.68	0.002	3480.68	0.00341	3480.68	0.00261587	3480.68	0.0002141	3480.68	0.00235832	3480.68	0.0016464
3482.61	0.0104	3482.61	0.00652	3482.61	0.00825	3482.61	0.00138271	3482.61	0.00111425	3482.61	0.0022732	3482.61	0.00171	3482.61	0.00342	3482.61	0.0025447	3482.61	-0.000215888	3482.61	0.00200546	3482.61	0.00138044
3484.54	0.011	3484.54	0.007	3484.54	0.00877	3484.54	0.000546932	3484.54	0.000534177	3484.54	0.00211036	3484.54	0.00165	3484.54	0.0033	3484.54	0.00260705	3484.54	-0.000432253	3484.54	0.00169492	3484.54	0.000975013
3486.47	0.0114	3486.47	0.00742	3486.47	0.00932	3486.47	0.000323057	3486.47	0.000759602	3486.47	0.0016675	3486.47	0.00198	3486.47	0.00333	3486.47	0.0027861	3486.47	-3.57628e-05	3486.47	0.00149429	3486.47	0.00076437
3488.4	0.0118	3488.4	0.00789	3488.4	0.0098	3488.4	0.00111425	3488.4	0.00126541	3488.4	0.000511885	3488.4	0.00233	3488.4	0.0035	3488.4	0.00282598	3488.4	0.000404596	3488.4	0.00100482	3488.4	0.000595927
3490.32	0.0124	3490.32	0.00868	3490.32	0.0104	3490.32	0.00184894	3490.32	0.00113189	3490.32	-0.000453353	3490.32	0.00241	3490.32	0.00364	3490.32	0.00280184	3490.32	8.58307e-06	3490.32	0.000554919	3490.32	0.000431061
3492.25	0.0129	3492.25	0.00973	3492.25	0.0111	3492.25	0.00173366	3492.25	0.000641227	3492.25	-4.95911e-05	3492.25	0.00236	3492.25	0.00368	3492.25	0.00291193	3492.25	-0.000596881	3492.25	0.000647545	3492.25	0.000244856
3494.18	0.0136	3494.18	0.0107	3494.18	0.0119	3494.18	0.00115812	3494.18	0.000289679	3494.18	0.00103652	3494.18	0.00233	3494.18	0.00367	3494.18	0.00303066	3494.18	-0.000490904	3494.18	0.000971556	3494.18	-0.000100732
3496.11	0.0145	3496.11	0.0114	3496.11	0.0126	3496.11	0.000475168	3496.11	-0.000255465	3496.11	0.00131941	3496.11	0.00234	3496.11	0.00364	3496.11	0.00294375	3496.11	0.00011909	3496.11	0.000965357	3496.11	-0.00032711
3498.04	0.0156	3498.04	0.0123	3498.04	0.0136	3498.04	-0.000230193	3498.04	-0.000502586	3498.04	0.00103092	3498.04	0.00258	3498.04	0.00375	3498.04	0.00300664	3498.04	0.000783563	3498.04	0.000855446	3498.04	4.79221e-05
3499.97	0.017	3499.97	0.0134	3499.97	0.015	3499.97	-0.000351429	3499.97	0.000347733	3499.97	0.00113165	3499.97	0.00318	3499.97	0.00416	3499.97	0.00358492	3499.97	0.00159311	3499.97	0.0012548	3499.97	0.00100183
3501.89	0.0181	3501.89	0.0146	3501.89	0.016	3501.89	0.000151992	3501.89	0.000926018	3501.89	0.000960946	3501.89	0.00371	3501.89	0.0045	3501.89	0.00401187	3501.89	0.00222385	3501.89	0.00176549	3501.89	0.00152516
3503.82	0.0188	3503.82	0.0155	3503.82	0.0167	3503.82	0.000542283	3503.82	-3.21865e-06	3503.82	0.000121236	3503.82	0.00377	3503.82	0.00467	3503.82	0.00385219	3503.82	0.00212789	3503.82	0.00169456	3503.82	0.00092864
3505.75	0.0199	3505.75	0.0166	3505.75	0.0178	3505.75	0.000950337	3505.75	-0.000543594	3505.75	0.000171542	3505.75	0.00393	3505.75	0.00508	3505.75	0.00396103	3505.75	0.00188482	3505.75	0.001647	3505.75	0.000337481
3507.68	0.0214	3507.68	0.018	3507.68	0.0193	3507.68	0.00146604	3507.68	0.000149846	3507.68	0.00102639	3507.68	0.00434	3507.68	0.00549	3507.68	0.00444329	3507.68	0.00184357	3507.68	0.00180447	3507.68	0.000420451
3509.61	0.0226	3509.61	0.019	3509.61	0.0204	3509.61	0.00147533	3509.61	0.000342965	3509.61	0.000859618	3509.61	0.00441	3509.61	0.00539	3509.61	0.0044415	3509.61	0.00129747	3509.61	0.00147188	3509.61	0.000253439
3511.54	0.0235	3511.54	0.0195	3511.54	0.0212	3511.54	0.00108802	3511.54	-0.000539064	3511.54	-0.000115991	3511.54	0.00403	3511.54	0.00508	3511.54	0.00394064	3511.54	0.000491261	3511.54	0.000987649	3511.54	-0.000502229
3513.46	0.0245	3513.46	0.0206	3513.46	0.0222	3513.46	0.000716805	3513.46	-0.00138831	3513.46	-0.000632763	3513.46	0.00364	3513.46	0.00512	3513.46	0.00368184	3513.46	0.000386	3513.46	0.000998139	3513.46	-0.00104094
3515.39	0.0258	3515.39	0.0222	3515.39	0.0236	3515.39	0.000626564	3515.39	-0.00143444	3515.39	-0.000432372	3515.39	0.0036	3515.39	0.00542	3515.39	0.00395382	3515.39	0.000521302	3515.39	0.00114369	3515.39	-0.00099504
3517.32	0.0273	3517.32	0.024	3517.32	0.0253	3517.32	0.00120354	3517.32	-0.000859737	3517.32	-0.000124097	3517.32	0.00393	3517.32	0.0058	3517.32	0.0044241	3517.32	0.000261426	3517.32	0.00103748	3517.32	-0.000855327
3519.25	0.0291	3519.25	0.0258	3519.25	0.0273	3519.25	0.00220585	3519.25	-0.000138998	3519.25	-6.04391e-05	3519.25	0.00446	3519.25	0.00642	3519.25	0.00491643	3519.25	0.000188112	3519.25	0.00113058	3519.25	-0.000745773
3521.18	0.031	3521.18	0.0276	3521.18	0.0291	3521.18	0.00286961	3521.18	0.00074625	3521.18	-2.5034e-05	3521.18	0.00508	3521.18	0.00706	3521.18	0.00547671	3521.18	0.000372767	3521.18	0.00157142	3521.18	-0.000291467
3523.11	0.0327	3523.11	0.0295	3523.11	0.0306	3523.11	0.00281823	3523.11	0.00165677	3523.11	0.000207901	3523.11	0.00556	3523.11	0.00726	3523.11	0.00587308	3523.11	0.000260592	3523.11	0.00182343	3523.11	0.000117063
3525.03	0.0343	3525.03	0.0315	3525.03	0.0323	3525.03	0.00242221	3525.03	0.0020076	3525.03	0.000854969	3525.03	0.00584	3525.03	0.00732	3525.03	0.00603038	3525.03	0.000375748	3525.03	0.0019033	3525.03	-4.12464e-05
3526.96	0.0359	3526.96	0.0334	3526.96	0.0342	3526.96	0.00176907	3526.96	0.00147176	3526.96	0.00134039	3526.96	0.006	3526.96	0.00755	3526.96	0.00600249	3526.96	0.00111508	3526.96	0.00182772	3526.96	-0.000689387
3528.89	0.0375	3528.89	0.0349	3528.89	0.036	3528.89	0.000327587	3528.89	0.000547171	3528.89	0.000755072	3528.89	0.00591	3528.89	0.00778	3528.89	0.00581032	3528.89	0.00161123	3528.89	0.00108755	3528.89	-0.00160885
3530.82	0.0393	3530.82	0.0364	3530.82	0.0379	3530.82	-0.00123346	3530.82	-3.85046e-05	3530.82	-0.000124216	3530.82	0.00581	3530.82	0.00794	3530.82	0.00570053	3530.82	0.00130987	3530.82	-5.24521e-06	3530.82	-0.0021956
3532.75	0.0412	3532.75	0.0382	3532.75	0.0399	3532.75	-0.00166237	3532.75	-0.000360489	3532.75	-0.000203252	3532.75	0.00615	3532.75	0.0081	3532.75	0.00585782	3532.75	0.000519037	3532.75	-0.00045538	3532.75	-0.00215507
3534.68	0.0433	3534.68	0.0403	3534.68	0.0422	3534.68	-0.00102031	3534.68	-0.000567198	3534.68	0.000137448	3534.68	0.00667	3534.68	0.0082	3534.68	0.00621754	3534.68	-0.000233293	3534.68	-0.000223041	3534.68	-0.00199771
3536.6	0.0456	3536.6	0.0426	3536.6	0.0444	3536.6	-0.000686526	3536.6	-0.000548124	3536.6	0.000124097	3536.6	0.00692	3536.6	0.00826	3536.6	0.00651169	3536.6	-0.000681639	3536.6	-9.98974e-05	3536.6	-0.00205398
3538.53	0.048	3538.53	0.045	3538.53	0.0467	3538.53	-0.00107396	3538.53	-0.000156164	3538.53	-9.95398e-05	3538.53	0.00719	3538.53	0.00857	3538.53	0.00679082	3538.53	-0.000965834	3538.53	-8.32081e-05	3538.53	-0.0020709
3540.46	0.0506	3540.46	0.0475	3540.46	0.0493	3540.46	-0.00112557	3540.46	0.000695586	3540.46	-7.72476e-05	3540.46	0.00785	3540.46	0.00939	3540.46	0.00741941	3540.46	-0.000871897	3540.46	0.000316262	3540.46	-0.00173759
3542.39	0.0535	3542.39	0.0503	3542.39	0.0522	3542.39	-0.000217915	3542.39	0.00150561	3542.39	0.000287294	3542.39	0.00869	3542.39	0.0105	3542.39	0.00836855	3542.39	-0.00012064	3542.39	0.000728965	3542.39	-0.000955939
3544.32	0.0562	3544.32	0.0531	3544.32	0.0549	3544.32	0.000904799	3544.32	0.00121772	3544.32	0.000666261	3544.32	0.00928	3544.32	0.0112	3544.32	0.0091005	3544.32	0.00083065	3544.32	0.000570178	3544.32	-0.000336528
3546.25	0.0586	3546.25	0.0557	3546.25	0.0575	3546.25	0.000933886	3546.25	-9.84669e-05	3546.25	0.000180244	3546.25	0.00938	3546.25	0.011	3546.25	0.00916004	3546.25	0.00101185	3546.25	-0.000127196	3546.25	-0.000758052
3548.17	0.0613	3548.17	0.0585	3548.17	0.0602	3548.17	0.000103354	3548.17	-0.00052774	3548.17	-0.000580549	3548.17	0.00949	3548.17	0.0109	3548.17	0.00920731	3548.17	4.95911e-05	3548.17	-0.000215292	3548.17	-0.0012722
3550.1	0.0644	3550.1	0.0616	3550.1	0.0632	3550.1	-0.00041616	3550.1	0.000191569	3550.1	-0.00035274	3550.1	0.01	3550.1	0.0115	3550.1	0.00972271	3550.1	-0.000982761	3550.1	0.000432611	3550.1	-0.000939846
3552.03	0.0674	3552.03	0.0647	3552.03	0.0662	3552.03	-0.000731826	3552.03	0.000293255	3552.03	9.2268e-05	3552.03	0.0104	3552.03	0.0119	3552.03	0.01004	3552.03	-0.00131333	3552.03	0.000453353	3552.03	-0.0010736
3553.96	0.0703	3553.96	0.0675	3553.96	0.0692	3553.96	-0.00123954	3553.96	-0.000713825	3553.96	-0.000149965	3553.96	0.0106	3553.96	0.0121	3553.96	0.0101116	3553.96	-0.000980616	3553.96	-0.000466228	3553.96	-0.00234508
3555.89	0.0732	3555.89	0.0707	3555.89	0.0723	3555.89	-0.00177038	3555.89	-0.0016408	3555.89	-0.000544906	3555.89	0.011	3555.89	0.0128	3555.89	0.0105519	3555.89	-0.000522256	3555.89	-0.00116432	3555.89	-0.00344133
3557.82	0.0765	3557.82	0.074	3557.82	0.0756	3557.82	-0.00217974	3557.82	-0.0019691	3557.82	-0.000405908	3557.82	0.0118	3557.82	0.0136	3557.82	0.0112445	3557.82	-0.000352144	3557.82	-0.00129354	3557.82	-0.0035857
3559.74	0.0799	3559.74	0.0772	3559.74	0.0791	3559.74	-0.00190961	3559.74	-0.0020473	3559.74	-0.000181198	3559.74	0.0128	3559.74	0.0143	3559.74	0.0120184	3559.74	-0.00041008	3559.74	-0.00123823	3559.74	-0.00283813
3561.67	0.0838	3561.67	0.0806	3561.67	0.0829	3561.67	-0.000105977	3561.67	-0.00119483	3561.67	0.000309706	3561.67	0.0141	3561.67	0.0153	3561.67	0.0134563	3561.67	-1.09673e-05	3561.67	-0.000724196	3561.67	-0.00142098
3563.6	0.0881	3563.6	0.0849	3563.6	0.0871	3563.6	0.0029918	3563.6	0.00162077	3563.6	0.00205266	3563.6	0.016	3563.6	0.0173	3563.6	0.0157384	3563.6	0.00134933	3563.6	0.000688314	3563.6	0.000330687
3565.53	0.0921	3565.53	0.0893	3565.53	0.0909	3565.53	0.00502634	3565.53	0.00423109	3565.53	0.00356448	3565.53	0.0172	3565.53	0.0186	3565.53	0.0170583	3565.53	0.00209677	3565.53	0.00172877	3565.53	0.00116289
3567.46	0.095	3567.46	0.0924	3567.46	0.0936	3567.46	0.00322294	3567.46	0.00264835	3567.46	0.00170028	3567.46	0.0164	3567.46	0.0175	3567.46	0.0156527	3567.46	6.86646e-05	3567.46	0.000380397	3567.46	-0.000622749
3569.39	0.0977	3569.39	0.0951	3569.39	0.0966	3569.39	3.29018e-05	3569.39	-0.000757217	3569.39	-0.00109947	3569.39	0.0155	3569.39	0.0165	3569.39	0.0144126	3569.39	-0.00228155	3569.39	-0.00150859	3569.39	-0.0029614
3571.31	0.101	3571.31	0.0985	3571.31	0.1	3571.31	-0.0012995	3571.31	-0.00209737	3571.31	-0.00149989	3571.31	0.0163	3571.31	0.0172	3571.31	0.01523	3571.31	-0.00277507	3571.31	-0.00196278	3571.31	-0.00370598
3573.24	0.105	3573.24	0.102	3573.24	0.104	3573.24	-0.00124717	3573.24	-0.0019294	3573.24	-0.000489712	3573.24	0.0177	3573.24	0.0185	3573.24	0.0164537	3573.24	-0.00252831	3573.24	-0.00187862	3573.24	-0.0035882
3575.17	0.108	3575.17	0.107	3575.17	0.108	3575.17	-0.000892997	3575.17	-0.00125456	3575.17	0.000171781	3575.17	0.0186	3575.17	0.0194	3575.17	0.0170845	3575.17	-0.00241923	3575.17	-0.0017128	3575.17	-0.00320625
3577.1	0.112	3577.1	0.11	3577.1	0.112	3577.1	-0.000669241	3577.1	-0.000442862	3577.1	-9.60827e-05	3577.1	0.0192	3577.1	0.02	3577.1	0.0174341	3577.1	-0.00237811	3577.1	-0.00138152	3577.1	-0.00280833
3579.03	0.116	3579.03	0.114	3579.03	0.116	3579.03	-0.000788569	3579.03	-0.000228167	3579.03	-0.000612259	3579.03	0.0196	3579.03	0.0206	3579.03	0.0178629	3579.03	-0.00218701	3579.03	-0.0013144	3579.03	-0.00260568
3580.96	0.12	3580.96	0.118	3580.96	0.12	3580.96	-0.00111735	3580.96	-0.000864983	3580.96	-0.000347614	3580.96	0.0205	3580.96	0.0214	3580.96	0.0187098	3580.96	-0.00165236	3580.96	-0.00125468	3580.96	-0.00212085
3582.88	0.124	3582.88	0.122	3582.88	0.124	3582.88	-0.000738144	3582.88	-0.00109434	3582.88	0.0012269	3582.88	0.0221	3582.88	0.0228	3582.88	0.0203595	3582.88	-0.000456452	3582.88	-0.000329733	3582.88	-0.000905633
3584.81	0.129	3584.81	0.127	3584.81	0.129	3584.81	0.000390649	3584.81	5.96046e-06	3584.81	0.00336051	3584.81	0.0239	3584.81	0.0245	3584.81	0.0223285	3584.81	0.000974655	3584.81	0.0012145	3584.81	0.000442147
3586.74	0.134	3586.74	0.131	3586.74	0.133	3586.74	0.000468373	3586.74	0.000905275	3586.74	0.00349235	3586.74	0.0245	3586.74	0.0251	3586.74	0.022698	3586.74	0.000918627	3586.74	0.00144374	3586.74	0.00046742
3588.67	0.137	3588.67	0.135	3588.67	0.136	3588.67	-0.000617623	3588.67	0.000213981	3588.67	0.0012604	3588.67	0.0239	3588.67	0.0247	3588.67	0.0217913	3588.67	-0.000525117	3588.67	-1.49012e-05	3588.67	-0.000634313
3590.6	0.141	3590.6	0.139	3590.6	0.14	3590.6	-0.000296116	3590.6	7.62939e-06	3590.6	0.000590444	3590.6	0.0247	3590.6	0.0255	3590.6	0.0226477	3590.6	-0.000668287	3590.6	-0.000156522	3590.6	-0.000456452
3592.53	0.145	3592.53	0.143	3592.53	0.145	3592.53	0.00129044	3592.53	0.000839949	3592.53	0.0017159	3592.53	0.0264	3592.53	0.0272	3592.53	0.0246233	3592.53	0.000439286	3592.53	0.00103581	3592.53	0.000877857
3594.46	0.15	3594.46	0.148	3594.46	0.15	3594.46	0.00209034	3594.46	0.0011574	3594.46	0.00202096	3594.46	0.0275	3594.46	0.0281	3594.46	0.0256528	3594.46	0.00110888	3594.46	0.00122225	3594.46	0.00154078
3596.38	0.154	3596.38	0.152	3596.38	0.154	3596.38	0.00163281	3596.38	0.000902414	3596.38	0.00112999	3596.38	0.0282	3596.38	0.0286	3596.38	0.0258579	3596.38	0.000866055	3596.38	0.000408411	3596.38	0.00120914
3598.31	0.158	3598.31	0.156	3598.31	0.157	3598.31	0.00149214	3598.31	0.00116122	3598.31	0.000934005	3598.31	0.029	3598.31	0.0291	3598.31	0.0263221	3598.31	0.000611067	3598.31	0.000294089	3598.31	0.000787258
3600.24	0.163	3600.24	0.161	3600.24	0.161	3600.24	0.00158215	3600.24	0.00110686	3600.24	0.00137865	3600.24	0.0295	3600.24	0.0294	3600.24	0.0267318	3600.24	0.00036943	3600.24	0.000461936	3600.24	-3.98159e-05
3602.17	0.166	3602.17	0.164	3602.17	0.165	3602.17	0.00107133	3602.17	0.00022769	3602.17	0.00155246	3602.17	0.0299	3602.17	0.0296	3602.17	0.0271907	3602.17	-0.000143766	3602.17	0.000321269	3602.17	-0.000994921
3604.1	0.17	3604.1	0.169	3604.1	0.17	3604.1	0.00107241	3604.1	0.000172257	3604.1	0.00193286	3604.1	0.0308	3604.1	0.0308	3604.1	0.0285312	3604.1	-2.41995e-05	3604.1	0.000738501	3604.1	-0.0006001
3606.03	0.175	3606.03	0.173	3606.03	0.175	3606.03	0.00155687	3606.03	0.000963569	3606.03	0.00232243	3606.03	0.0319	3606.03	0.0325	3606.03	0.0300693	3606.03	0.000636697	3606.03	0.00150323	3606.03	0.000695705
3607.95	0.18	3607.95	0.177	3607.95	0.179	3607.95	0.000729919	3607.95	0.000494361	3607.95	0.00158513	3607.95	0.0323	3607.95	0.0331	3607.95	0.0306311	3607.95	0.000299335	3607.95	0.00100183	3607.95	0.000947118
3609.88	0.184	3609.88	0.181	3609.88	0.183	3609.88	-0.000363469	3609.88	-0.000428438	3609.88	0.0006845	3609.88	0.0326	3609.88	0.0332	3609.88	0.0309938	3609.88	-0.00049603	3609.88	-0.000431299	3609.88	0.000473142
3611.81	0.188	3611.81	0.186	3611.81	0.187	3611.81	0.000218749	3611.81	0.000171065	3611.81	0.000881553	3611.81	0.0336	3611.81	0.0339	3611.81	0.0317361	3611.81	-0.000599265	3611.81	-0.0010674	3611.81	0.000363112
3613.74	0.192	3613.74	0.19	3613.74	0.192	3613.74	0.0015105	3613.74	0.00116825	3613.74	0.00142324	3613.74	0.0346	3613.74	0.035	3613.74	0.0322792	3613.74	-0.000465393	3613.74	-0.00079906	3613.74	0.000197887
3615.67	0.196	3615.67	0.195	3615.67	0.197	3615.67	0.00251341	3615.67	0.00168097	3615.67	0.00222647	3615.67	0.0361	3615.67	0.0368	3615.67	0.0333061	3615.67	-2.0504e-05	3615.67	0.000364542	3615.67	0.000876307
3617.6	0.201	3617.6	0.2	3617.6	0.201	3617.6	0.00257206	3617.6	0.00166607	3617.6	0.00244033	3617.6	0.0376	3617.6	0.038	3617.6	0.0341346	3617.6	0.000597	3617.6	0.00150251	3617.6	0.00204921
3619.52	0.204	3619.52	0.204	3619.52	0.205	3619.52	0.00140023	3619.52	0.000757575	3619.52	0.000795245	3619.52	0.038	3619.52	0.0373	3619.52	0.0335512	3619.52	0.000728249	3619.52	0.000996351	3619.52	0.00147796
3621.45	0.209	3621.45	0.208	3621.45	0.21	3621.45	0.000902414	3621.45	0.000271201	3621.45	-7.08103e-05	3621.45	0.0385	3621.45	0.0374	3621.45	0.0339395	3621.45	0.000813007	3621.45	0.000286698	3621.45	0.00059402
3623.38	0.214	3623.38	0.213	3623.38	0.215	3623.38	0.00214291	3623.38	0.00138712	3623.38	0.00152326	3623.38	0.0402	3623.38	0.0396	3623.38	0.0363709	3623.38	0.00158989	3623.38	0.00107324	3623.38	0.00144923
3625.31	0.22	3625.31	0.218	3625.31	0.22	3625.31	0.00487208	3625.31	0.00388634	3625.31	0.00473559	3625.31	0.0427	3625.31	0.0425	3625.31	0.0394663	3625.31	0.00348711	3625.31	0.00311315	3625.31	0.00352287
3627.24	0.225	3627.24	0.224	3627.24	0.225	3627.24	0.0069108	3627.24	0.00604391	3627.24	0.00682974	3627.24	0.0444	3627.24	0.0439	3627.24	0.0408514	3627.24	0.00516737	3627.24	0.00435448	3627.24	0.00471532
3629.17	0.229	3629.17	0.228	3629.17	0.228	3629.17	0.00453246	3629.17	0.00469518	3629.17	0.00373018	3629.17	0.0432	3629.17	0.042	3629.17	0.03888	3629.17	0.00367486	3629.17	0.00195718	3629.17	0.00230205
3631.09	0.232	3631.09	0.231	3631.09	0.232	3631.09	0.00161445	3631.09	0.00174129	3631.09	-5.30481e-05	3631.09	0.0424	3631.09	0.0414	3631.09	0.0380687	3631.09	0.00131846	3631.09	-0.000216842	3631.09	-0.000190735
3633.02	0.237	3633.02	0.235	3633.02	0.237	3633.02	0.000439644	3633.02	-0.000576377	3633.02	-0.00149262	3633.02	0.0431	3633.02	0.0426	3633.02	0.0390123	3633.02	-5.126e-05	3633.02	-0.000284672	3633.02	-0.000591517
3634.95	0.241	3634.95	0.24	3634.95	0.242	3634.95	-0.00102913	3634.95	-0.0026536	3634.95	-0.00221694	3634.95	0.0438	3634.95	0.0434	3634.95	0.0396138	3634.95	-0.00142348	3634.95	-0.000456572	3634.95	-0.000485539
3636.88	0.245	3636.88	0.244	3636.88	0.247	3636.88	-0.00226021	3636.88	-0.00352418	3636.88	-0.00239575	3636.88	0.0444	3636.88	0.0441	3636.88	0.0401987	3636.88	-0.00221574	3636.88	-0.00125873	3636.88	-0.000490427
3638.81	0.25	3638.81	0.249	3638.81	0.251	3638.81	-0.00248742	3638.81	-0.00303996	3638.81	-0.00242257	3638.81	0.0453	3638.81	0.0451	3638.81	0.0409969	3638.81	-0.00237858	3638.81	-0.00222564	3638.81	-0.00081408
3640.74	0.255	3640.74	0.253	3640.74	0.256	3640.74	-0.00205719	3640.74	-0.00221205	3640.74	-0.00244904	3640.74	0.0462	3640.74	0.0458	3640.74	0.0417366	3640.74	-0.00253487	3640.74	-0.00269294	3640.74	-0.0013479
3642.66	0.26	3642.66	0.258	3642.66	0.261	3642.66	-0.000945926	3642.66	-0.00107932	3642.66	-0.00147998	3642.66	0.0477	3642.66	0.0469	3642.66	0.0431208	3642.66	-0.0019747	3642.66	-0.00199807	3642.66	-0.00144875
3644.59	0.265	3644.59	0.263	3644.59	0.266	3644.59	0.00140357	3644.59	0.00122583	3644.59	0.000959039	3644.59	0.0499	3644.59	0.0489	3644.59	0.0458666	3644.59	0.000119805	3644.59	-2.53916e-05	3644.59	-0.000142217
3646.52	0.271	3646.52	0.269	3646.52	0.271	3646.52	0.00431752	3646.52	0.00395226	3646.52	0.00320566	3646.52	0.0521	3646.52	0.0507	3646.52	0.0485995	3646.52	0.00245643	3646.52	0.00234044	3646.52	0.00225878
3648.45	0.274	3648.45	0.273	3648.45	0.275	3648.45	0.00380719	3648.45	0.00303698	3648.45	0.00126529	3648.45	0.0518	3648.45	0.0495	3648.45	0.0473233	3648.45	0.00162888	3648.45	0.00174212	3648.45	0.002195
3650.38	0.276	3650.38	0.276	3650.38	0.277	3650.38	-0.000874162	3650.38	-0.0017308	3650.38	-0.00390208	3650.38	0.0499	3650.38	0.0469	3650.38	0.0434306	3650.38	-0.00169969	3650.38	-0.0026257	3650.38	-0.00102878
3652.31	0.279	3652.31	0.279	3652.31	0.281	3652.31	-0.00263333	3652.31	-0.00358796	3652.31	-0.00470388	3652.31	0.0504	3652.31	0.0478	3652.31	0.0437494	3652.31	-0.00247323	3652.31	-0.00424933	3652.31	-0.00176847
3654.23	0.283	3654.23	0.283	3654.23	0.286	3654.23	-0.00208723	3654.23	-0.00337994	3654.23	-0.00308609	3654.23	0.0517	3654.23	0.0498	3654.23	0.0458055	3654.23	-0.00204968	3654.23	-0.00363374	3654.23	-0.00111937
3656.16	0.287	3656.16	0.286	3656.16	0.289	3656.16	-0.00272715	3656.16	-0.00407147	3656.16	-0.00371277	3656.16	0.0517	3656.16	0.05	3656.16	0.0460305	3656.16	-0.00267386	3656.16	-0.00385582	3656.16	-0.00211585
3658.09	0.291	3658.09	0.29	3658.09	0.292	3658.09	-0.00400949	3658.09	-0.00523853	3658.09	-0.00542045	3658.09	0.0514	3658.09	0.0497	3658.09	0.045714	3658.09	-0.0034591	3658.09	-0.00430095	3658.09	-0.00357652
3660.02	0.294	3660.02	0.293	3660.02	0.295	3660.02	-0.00412238	3660.02	-0.00539184	3660.02	-0.00534463	3660.02	0.0521	3660.02	0.0504	3660.02	0.0466481	3660.02	-0.0031668	3660.02	-0.00391495	3660.02	-0.00367832
3661.95	0.297	3661.95	0.296	3661.95	0.298	3661.95	-0.0037837	3661.95	-0.00484181	3661.95	-0.00450957	3661.95	0.053	3661.95	0.0513	3661.95	0.0477722	3661.95	-0.00237513	3661.95	-0.00356102	3661.95	-0.00339103
3663.88	0.301	3663.88	0.299	3663.88	0.301	3663.88	-0.00283194	3663.88	-0.00373232	3663.88	-0.0033412	3663.88	0.0542	3663.88	0.0523	3663.88	0.048919	3663.88	-0.00142717	3663.88	-0.00296724	3663.88	-0.0027411
3665.8	0.304	3665.8	0.302	3665.8	0.304	3665.8	-0.000315785	3665.8	-0.00176656	3665.8	-0.00113153	3665.8	0.0561	3665.8	0.054	3665.8	0.050814	3665.8	-0.000307679	3665.8	-0.00132954	3665.8	-0.000873566
3667.73	0.307	3667.73	0.305	3667.73	0.307	3667.73	0.00240493	3667.73	0.000236392	3667.73	0.00107062	3667.73	0.0579	3667.73	0.0552	3667.73	0.0523957	3667.73	7.52211e-05	3667.73	0.00059104	3667.73	0.001351
3669.66	0.308	3669.66	0.305	3669.66	0.308	3669.66	0.00235796	3669.66	0.000368953	3669.66	0.000472546	3669.66	0.0576	3669.66	0.054	3669.66	0.0514751	3669.66	-0.000963807	3669.66	0.00106502	3669.66	0.00152421
3671.59	0.309	3671.59	0.306	3671.59	0.309	3671.59	0.00207222	3671.59	0.000659943	3671.59	-0.00020349	3671.59	0.0573	3671.59	0.0538	3671.59	0.0510649	3671.59	-0.000333905	3671.59	0.00166988	3671.59	0.00137544
3673.52	0.311	3673.52	0.308	3673.52	0.31	3673.52	0.00363684	3673.52	0.0027796	3673.52	0.000760913	3673.52	0.0584	3673.52	0.0555	3673.52	0.0523375	3673.52	0.00182044	3673.52	0.00319457	3673.52	0.00280642
3675.45	0.309	3675.45	0.306	3675.45	0.309	3675.45	0.00259113	3675.45	0.00231934	3675.45	-0.00168514	3675.45	0.0574	3675.45	0.054	3675.45	0.0507924	3675.45	0.00138474	3675.45	0.00190115	3675.45	0.00183797
3677.37	0.306	3677.37	0.303	3677.37	0.306	3677.37	-0.000216961	3677.37	-0.000702858	3677.37	-0.00474036	3677.37	0.0553	3677.37	0.0513	3677.37	0.0485358	3677.37	-0.00047791	3677.37	-0.000846267	3677.37	-0.000973344
3679.3	0.304	3679.3	0.301	3679.3	0.305	3679.3	-0.00140488	3679.3	-0.00183761	3679.3	-0.00462115	3679.3	0.0548	3679.3	0.051	3679.3	0.0483235	3679.3	-0.000933528	3679.3	-0.00170529	3679.3	-0.00175583
3681.23	0.302	3681.23	0.299	3681.23	0.302	3681.23	-0.00178122	3681.23	-0.00179303	3681.23	-0.00398302	3681.23	0.0546	3681.23	0.0513	3681.23	0.0483281	3681.23	-0.000757575	3681.23	-0.00180638	3681.23	-0.00149429
3683.16	0.3	3683.16	0.298	3683.16	0.3	3683.16	-0.000972033	3683.16	-0.0012548	3683.16	-0.00304282	3683.16	0.0549	3683.16	0.0521	3683.16	0.0489912	3683.16	-0.000130892	3683.16	-0.000860572	3683.16	-0.000569701
3685.09	0.297	3685.09	0.295	3685.09	0.298	3685.09	0.000777602	3685.09	5.74589e-05	3685.09	-0.00117195	3685.09	0.0559	3685.09	0.0534	3685.09	0.0505909	3685.09	0.00123239	3685.09	0.00125468	3685.09	0.001109
3687.02	0.293	3687.02	0.291	3687.02	0.293	3687.02	0.00243247	3687.02	0.00196934	3687.02	0.000837684	3687.02	0.0562	3687.02	0.0535	3687.02	0.051322	3687.02	0.00290203	3687.02	0.0029186	3687.02	0.00274932
3688.94	0.285	3688.94	0.283	3688.94	0.285	3688.94	0.00252438	3688.94	0.00254774	3688.94	0.000983715	3688.94	0.0543	3688.94	0.0506	3688.94	0.048667	3688.94	0.00322831	3688.94	0.00235593	3688.94	0.00271154
3690.87	0.275	3690.87	0.274	3690.87	0.276	3690.87	0.00102007	3690.87	0.00105667	3690.87	-0.000647902	3690.87	0.0512	3690.87	0.0473	3690.87	0.0447743	3690.87	0.00176215	3690.87	0.000791907	3690.87	0.00124693
3692.8	0.267	3692.8	0.266	3692.8	0.268	3692.8	0.000507951	3692.8	0.00024426	3692.8	-0.00116134	3692.8	0.0495	3692.8	0.0462	3692.8	0.0432187	3692.8	0.000693798	3692.8	0.000448942	3692.8	0.000877142
3694.73	0.259	3694.73	0.258	3694.73	0.26	3694.73	0.00106967	3694.73	0.000320792	3694.73	-0.000319123	3694.73	0.0484	3694.73	0.0457	3694.73	0.0425871	3694.73	0.000528574	3694.73	0.000760198	3694.73	0.00167406
3696.66	0.249	3696.66	0.249	3696.66	0.251	3696.66	0.00177884	3696.66	0.000597119	3696.66	0.000936985	3696.66	0.0472	3696.66	0.0449	3696.66	0.0417402	3696.66	0.00114393	3696.66	0.00105655	3696.66	0.00262284
3698.59	0.239	3698.59	0.238	3698.59	0.241	3698.59	0.00255704	3698.59	0.00118744	3698.59	0.00224757	3698.59	0.0457	3698.59	0.0437	3698.59	0.0407412	3698.59	0.00230217	3698.59	0.00161838	3698.59	0.00311303
3700.51	0.226	3700.51	0.225	3700.51	0.228	3700.51	0.00298297	3700.51	0.00140369	3700.51	0.00286245	3700.51	0.043	3700.51	0.0411	3700.51	0.0385667	3700.51	0.00296271	3700.51	0.00194764	3700.51	0.00275159
3702.44	0.209	3702.44	0.209	3702.44	0.212	3702.44	0.00252807	3702.44	0.000491261	3702.44	0.00204062	3702.44	0.039	3702.44	0.0373	3702.44	0.0350399	3702.44	0.00230205	3702.44	0.00133324	3702.44	0.00198722
3704.37	0.195	3704.37	0.195	3704.37	0.197	3704.37	0.00252294	3704.37	5.37634e-05	3704.37	0.00184023	3704.37	0.0364	3704.37	0.0351	3704.37	0.032824	3704.37	0.00150466	3704.37	0.0014168	3704.37	0.00234866
3706.3	0.183	3706.3	0.183	3706.3	0.185	3706.3	0.00364029	3706.3	0.00115704	3706.3	0.00340855	3706.3	0.0353	3706.3	0.0345	3706.3	0.0319779	3706.3	0.00180817	3706.3	0.00312459	3706.3	0.00391936
3708.23	0.169	3708.23	0.169	3708.23	0.172	3708.23	0.00493002	3708.23	0.00308907	3708.23	0.00507152	3708.23	0.0339	3708.23	0.0334	3708.23	0.0305413	3708.23	0.00316954	3708.23	0.00510192	3708.23	0.00542367
3710.16	0.151	3710.16	0.15	3710.16	0.153	3710.16	0.00423884	3710.16	0.00342238	3710.16	0.00351489	3710.16	0.0296	3710.16	0.029	3710.16	0.0262297	3710.16	0.00364292	3710.16	0.00458932	3710.16	0.00423062
3712.08	0.128	3712.08	0.127	3712.08	0.13	3712.08	0.000634551	3712.08	0.000427365	3712.08	-0.00128961	3712.08	0.0227	3712.08	0.0219	3712.08	0.0193362	3712.08	0.000641704	3712.08	0.00101614	3712.08	0.00050199
3714.01	0.111	3714.01	0.11	3714.01	0.112	3714.01	-0.00126779	3714.01	-0.00157511	3714.01	-0.003057	3714.01	0.0184	3714.01	0.0183	3714.01	0.0156191	3714.01	-0.00230563	3714.01	-0.00102902	3714.01	-0.00046742
3715.94	0.099	3715.94	0.0978	3715.94	0.0998	3715.94	-7.96318e-05	3715.94	-0.000977397	3715.94	-0.00169861	3715.94	0.0172	3715.94	0.0178	3715.94	0.0150702	3715.94	-0.00218499	3715.94	-0.000597715	3715.94	0.00106764
3717.87	0.0872	3717.87	0.0859	3717.87	0.0882	3717.87	0.00223267	3717.87	0.000804305	3717.87	0.000368595	3717.87	0.0167	3717.87	0.0176	3717.87	0.0148713	3717.87	0.000195503	3717.87	0.00106549	3717.87	0.00284445
3719.8	0.0749	3719.8	0.0738	3719.8	0.076	3719.8	0.00425625	3719.8	0.00315774	3719.8	0.00273693	3719.8	0.0158	3719.8	0.0167	3719.8	0.0141235	3719.8	0.00299764	3719.8	0.00328469	3719.8	0.00429487
3721.73	0.0632	3721.73	0.0625	3721.73	0.0643	3721.73	0.00594878	3721.73	0.00538814	3721.73	0.00483453	3721.73	0.0145	3721.73	0.0152	3721.73	0.0129482	3721.73	0.00478721	3721.73	0.00512052	3721.73	0.00535941
3723.65	0.0527	3723.65	0.0523	3723.65	0.0538	3723.65	0.00754106	3723.65	0.00646997	3723.65	0.00529063	3723.65	0.0129	3723.65	0.0135	3723.65	0.0115033	3723.65	0.00565469	3723.65	0.00573647	3723.65	0.00612855
3725.58	0.0434	3725.58	0.0428	3725.58	0.0443	3725.58	0.00785375	3725.58	0.00654578	3725.58	0.00393689	3725.58	0.0109	3725.58	0.0117	3725.58	0.00967616	3725.58	0.00572789	3725.58	0.00525761	3725.58	0.00647557
3727.51	0.0363	3727.51	0.0352	3727.51	0.0371	3727.51	0.00718999	3727.51	0.00694776	3727.51	0.00319123	3727.51	0.00944	3727.51	0.0106	3727.51	0.00842851	3727.51	0.00536406	3727.51	0.00523329	3727.51	0.00677156
3729.44	0.032	3729.44	0.0306	3729.44	0.0332	3729.44	0.00740528	3729.44	0.00787902	3729.44	0.00444019	3729.44	0.00941	3729.44	0.0109	3729.44	0.00857562	3729.44	0.00566232	3729.44	0.00659025	3729.44	0.00758338
3731.37	0.0289	3731.37	0.0273	3731.37	0.0306	3731.37	0.00852501	3731.37	0.00850809	3731.37	0.00641751	3731.37	0.00966	3731.37	0.0114	3731.37	0.00904936	3731.37	0.00691724	3731.37	0.00854194	3731.37	0.0083369
3733.3	0.025	3733.3	0.0233	3733.3	0.0268	3733.3	0.00886262	3733.3	0.00861883	3733.3	0.00762367	3733.3	0.00882	3733.3	0.0104	3733.3	0.00833994	3733.3	0.00832391	3733.3	0.00935709	3733.3	0.0078156
3735.22	0.0198	3735.22	0.0183	3735.22	0.0212	3735.22	0.00629497	3735.22	0.00753617	3735.22	0.00592148	3735.22	0.00617	3735.22	0.00738	3735.22	0.00553292	3735.22	0.00716198	3735.22	0.00690329	3735.22	0.00539506
3737.15	0.0154	3737.15	0.014	3737.15	0.0166	3737.15	0.0032258	3737.15	0.00482285	3737.15	0.0020386	3737.15	0.00345	3737.15	0.00472	3737.15	0.00268483	3737.15	0.00328028	3737.15	0.00318456	3737.15	0.0028975
3739.08	0.0141	3739.08	0.0127	3739.08	0.0155	3739.08	0.00367832	3739.08	0.00316453	3739.08	0.000590324	3739.08	0.00333	3739.08	0.00466	3739.08	0.00279462	3739.08	0.00104034	3739.08	0.00211704	3739.08	0.00257623
3741.01	0.0145	3741.01	0.0131	3741.01	0.0164	3741.01	0.00682843	3741.01	0.00388908	3741.01	0.00181019	3741.01	0.00511	3741.01	0.00624	3741.01	0.00490272	3741.01	0.00111115	3741.01	0.00313425	3741.01	0.00378704
3742.94	0.0139	3742.94	0.0124	3742.94	0.0157	3742.94	0.00876296	3742.94	0.00487542	3742.94	0.00185966	3742.94	0.00577	3742.94	0.00637	3742.94	0.00539714	3742.94	0.00105905	3742.94	0.00337422	3742.94	0.00416076
3744.87	0.0108	3744.87	0.00954	3744.87	0.0124	3744.87	0.00623012	3744.87	0.00363302	3744.87	-0.000476599	3744.87	0.00362	3744.87	0.00376	3744.87	0.00263447	3744.87	-0.000194073	3744.87	0.00216436	3744.87	0.00304294
3746.8	0.00966	3746.8	0.00872	3746.8	0.0114	3746.8	0.00467062	3746.8	0.00318193	3746.8	0.000613689	3746.8	0.00295	3746.8	0.00317	3746.8	0.0022608	3746.8	0.000158906	3746.8	0.00313008	3746.8	0.0036205
3748.72	0.00998	3748.72	0.00908	3748.72	0.0116	3748.72	0.0055424	3748.72	0.00380254	3748.72	0.00322497	3748.72	0.00392	3748.72	0.00396	3748.72	0.00368768	3748.72	0.00202799	3748.72	0.00447118	3748.72	0.00464094
3750.65	0.00785	3750.65	0.0065	3750.65	0.00896	3750.65	0.00371921	3750.65	0.00150788	3750.65	0.00136399	3750.65	0.00262	3750.65	0.00201	3750.65	0.00128633	3750.65	0.00200439	3750.65	0.00183165	3750.65	0.00246835
3752.58	0.00526	3752.58	0.0035	3752.58	0.00647	3752.58	0.000841141	3752.58	-0.00182402	3752.58	-0.00169361	3752.58	0.000563	3752.58	0.000228	3752.58	-0.00189096	3752.58	-0.000182033	3752.58	-0.00153422	3752.58	-0.000470161
3754.51	0.00498	3754.51	0.00325	3754.51	0.00671	3754.51	0.00115514	3754.51	-0.00239456	3754.51	-0.00148869	3754.51	0.000738	3754.51	0.00127	3754.51	-0.00110066	3754.51	-0.00113714	3754.51	-0.00159574	3754.51	-0.000538111
3756.44	0.00533	3756.44	0.00382	3756.44	0.00725	3756.44	0.00248063	3756.44	-0.00152242	3756.44	-0.000522852	3756.44	0.00157	3756.44	0.00251	3756.44	0.000790119	3756.44	-0.00117815	3756.44	-0.000311971	3756.44	0.000621438
3758.37	0.00464	3758.37	0.00319	3758.37	0.00646	3758.37	0.00185835	3758.37	-0.00120389	3758.37	-0.0012666	3758.37	0.00127	3758.37	0.00201	3758.37	0.000671625	3758.37	-0.00176561	3758.37	4.00543e-05	3758.37	0.000355363
3760.29	0.00335	3760.29	0.00171	3760.29	0.00507	3760.29	-0.000443935	3760.29	-0.00200462	3760.29	-0.00290108	3760.29	0.000378	3760.29	0.000731	3760.29	-0.000605643	3760.29	-0.00239837	3760.29	-0.000683546	3760.29	-0.00120401
3762.22	0.00323	3762.22	0.00148	3762.22	0.00492	3762.22	-0.00102663	3762.22	-0.00219762	3762.22	-0.00243425	3762.22	0.000683	3762.22	0.000932	3762.22	-0.000220478	3762.22	-0.00202	3762.22	-0.000260472	3762.22	-0.00128853
3764.15	0.0035	3764.15	0.00177	3764.15	0.00515	3764.15	0.000160575	3764.15	-0.00183559	3764.15	-0.000769258	3764.15	0.0013	3764.15	0.0016	3764.15	0.000639617	3764.15	-0.00151539	3764.15	0.00095427	3764.15	-0.000563741
3766.08	0.00329	3766.08	0.00155	3766.08	0.0049	3766.08	0.00123262	3766.08	-0.00154841	3766.08	0.000229716	3766.08	0.00137	3766.08	0.00166	3766.08	0.000718117	3766.08	-0.00127757	3766.08	0.00122666	3766.08	-0.000184536
3768.01	0.00258	3768.01	0.00102	3768.01	0.00435	3768.01	0.0013181	3768.01	-0.0012362	3768.01	0.000301123	3768.01	0.0012	3768.01	0.00131	3768.01	0.000343621	3768.01	-0.00103855	3768.01	0.000362396	3768.01	0.000210524
3769.94	0.00108	3769.94	-0.000202	3769.94	0.00313	3769.94	0.000177741	3769.94	-0.00185776	3769.94	-0.00132787	3769.94	0.000337	3769.94	0.000159	3769.94	-0.000880957	3769.94	-0.0015496	3769.94	-0.00141454	3769.94	-9.17911e-06
3771.86	0.000147	3771.86	-0.0011	3771.86	0.00236	3771.86	-0.000939727	3771.86	-0.00298381	3771.86	-0.00345898	3771.86	-0.000433	3771.86	-0.000772	3771.86	-0.00168657	3771.86	-0.00252283	3771.86	-0.00272751	3771.86	-0.000355482
3773.79	0.000595	3773.79	-0.000755	3773.79	0.00273	3773.79	-0.000549078	3773.79	-0.00324488	3773.79	-0.00370955	3773.79	-9.6e-06	3773.79	-0.000438	3773.79	-0.00103003	3773.79	-0.0028615	3773.79	-0.00236714	3773.79	0.000192285
3775.72	0.00145	3775.72	3.68e-05	3775.72	0.00331	3775.72	0.000542164	3775.72	-0.0030756	3775.72	-0.002455	3775.72	0.000987	3775.72	0.000465	3775.72	3.79086e-05	3775.72	-0.00261104	3775.72	-0.000936627	3775.72	0.000977397
3777.65	0.00151	3777.65	3.16e-05	3777.65	0.00311	3777.65	0.000646114	3777.65	-0.00328481	3777.65	-0.00174415	3777.65	0.00117	3777.65	0.000686	3777.65	0.000164568	3777.65	-0.00242388	3777.65	-0.000221133	3777.65	0.000993133
3779.58	0.000472	3779.58	-0.000894	3779.58	0.00212	3779.58	-0.00048244	3779.58	-0.00369573	3779.58	-0.0024904	3779.58	0.000312	3779.58	-0.000245	3779.58	-0.000829518	3779.58	-0.00253868	3779.58	-0.00122833	3779.58	0.000341415
3781.51	-0.000102	3781.51	-0.00104	3781.51	0.0018	3781.51	-0.000538588	3781.51	-0.00297761	3781.51	-0.00231195	3781.51	9.33e-05	3781.51	-0.000605	3781.51	-0.00113445	3781.51	-0.00207448	3781.51	-0.00184763	3781.51	0.000581026
3783.43	4.6e-05	3783.43	-0.000676	3783.43	0.00203	3783.43	0.000251532	3783.43	-0.00158286	3783.43	-0.00113332	3783.43	0.000457	3783.43	-0.000327	3783.43	-0.000852406	3783.43	-0.00131118	3783.43	-0.00136805	3783.43	0.00113034
3785.36	-0.000148	3785.36	-0.00107	3785.36	0.00175	3785.36	-8.46386e-06	3785.36	-0.00122929	3785.36	-0.00134158	3785.36	0.000134	3785.36	-0.000682	3785.36	-0.00112349	3785.36	-0.00146258	3785.36	-0.00145567	3785.36	0.00049448
3787.29	-0.000435	3787.29	-0.00153	3787.29	0.00153	3787.29	-0.000628233	3787.29	-0.00191534	3787.29	-0.00230992	3787.29	-0.000255	3787.29	-0.00109	3787.29	-0.00112361	3787.29	-0.00213265	3787.29	-0.0019877	3787.29	-0.000356078
3789.22	-0.000394	3789.22	-0.00149	3789.22	0.00171	3789.22	-0.000544071	3789.22	-0.00260413	3789.22	-0.00248754	3789.22	-9.29e-05	3789.22	-0.00104	3789.22	-0.00064683	3789.22	-0.00245333	3789.22	-0.00192463	3789.22	-0.000432014
3791.15	-7.21e-05	3791.15	-0.00113	3791.15	0.00204	3791.15	-3.85046e-05	3791.15	-0.00257623	3791.15	-0.00210488	3791.15	0.000416	3791.15	-0.000608	3791.15	-0.000161529	3791.15	-0.00261736	3791.15	-0.00124121	3791.15	-0.000291824
3793.08	0.000547	3793.08	-0.000434	3793.08	0.00262	3793.08	0.000730276	3793.08	-0.00170171	3793.08	-0.00131655	3793.08	0.0011	3793.08	0.00034	3793.08	0.000606954	3793.08	-0.00272799	3793.08	-0.000176191	3793.08	-3.33786e-05
3795	0.000951	3795	1.09e-05	3795	0.0029	3795	0.00143611	3795	-0.000956178	3795	-0.000187755	3795	0.00133	3795	0.00108	3795	0.00116795	3795	-0.00262713	3795	0.000631571	3795	0.000304461
3796.93	0.00134	3796.93	0.000273	3796.93	0.00305	3796.93	0.00222671	3796.93	-0.000212908	3796.93	0.00154686	3796.93	0.00145	3796.93	0.00161	3796.93	0.00156289	3796.93	-0.00183415	3796.93	0.00126207	3796.93	0.00109935
3798.86	0.00211	3798.86	0.000983	3798.86	0.00392	3798.86	0.00358605	3798.86	0.00113511	3798.86	0.00347257	3798.86	0.0022	3798.86	0.00235	3798.86	0.00243938	3798.86	-0.000254989	3798.86	0.00236881	3798.86	0.00222039
3800.79	0.0011	3800.79	0.000222	3800.79	0.00347	3800.79	0.00297046	3800.79	0.000367403	3800.79	0.00232124	3800.79	0.00157	3800.79	0.00118	3800.79	0.00115949	3800.79	0.000134468	3800.79	0.00191271	3800.79	0.00148046
3802.72	-0.00079	3802.72	-0.00149	3802.72	0.0019	3802.72	0.000586867	3802.72	-0.00173748	3802.72	-0.00055027	3802.72	2.52e-05	3802.72	-0.000877	3802.72	-0.00111127	3802.72	-0.000772834	3802.72	0.000264764	3802.72	0.000226855
3804.65	-0.000794	3804.65	-0.00153	3804.65	0.00183	3804.65	0.000252843	3804.65	-0.00139773	3804.65	-0.00076592	3804.65	0.00012	3804.65	-0.000725	3804.65	-0.000636816	3804.65	-0.000731349	3804.65	0.000317693	3804.65	0.000751972
3806.57	-0.00131	3806.57	-0.00203	3806.57	0.00123	3806.57	-0.000503063	3806.57	-0.00150383	3806.57	-0.00168669	3806.57	-0.000305	3806.57	-0.00108	3806.57	-0.000902355	3806.57	-0.0014646	3806.57	-0.000344753	3806.57	-2.86102e-06
3808.5	-0.00229	3808.5	-0.00285	3808.5	0.000185	3808.5	-0.00191164	3808.5	-0.00268888	3808.5	-0.00306106	3808.5	-0.00113	3808.5	-0.00179	3808.5	-0.00207072	3808.5	-0.0029974	3808.5	-0.00199258	3808.5	-0.00148749
3810.43	-0.00165	3810.43	-0.00205	3810.43	0.000865	3810.43	-0.00103009	3810.43	-0.00194669	3810.43	-0.00163734	3810.43	-0.000438	3810.43	-0.00066	3810.43	-0.00118935	3810.43	-0.00256407	3810.43	-0.00207186	3810.43	-0.00101745
3812.36	-1.79e-06	3812.36	-0.000512	3812.36	0.0026	3812.36	0.00158334	3812.36	0.000389934	3812.36	0.0010792	3812.36	0.000955	3812.36	0.00119	3812.36	0.000655472	3812.36	-0.000419021	3812.36	-0.000926018	3812.36	0.00053668
3814.29	0.000978	3814.29	0.00017	3814.29	0.0036	3814.29	0.00399828	3814.29	0.00201964	3814.29	0.00213921	3814.29	0.0014	3814.29	0.0019	3814.29	0.00123	3814.29	0.00130761	3814.29	-0.000226617	3814.29	0.00178301
3816.22	0.000516	3816.22	-0.000263	3816.22	0.00322	3816.22	0.00456727	3816.22	0.00172162	3816.22	0.00121915	3816.22	0.000516	3816.22	0.00136	3816.22	0.000402212	3816.22	0.00100493	3816.22	-0.000762939	3816.22	0.0021404
3818.14	0.000677	3818.14	-1.75e-05	3818.14	0.00346	3818.14	0.00463831	3818.14	0.00204921	3818.14	0.00207007	3818.14	0.000752	3818.14	0.00198	3818.14	0.00110292	3818.14	0.000721812	3818.14	-0.000203848	3818.14	0.00271356
3820.07	0.000454	3820.07	-0.000623	3820.07	0.00292	3820.07	0.00355959	3820.07	0.00178862	3820.07	0.00222897	3820.07	0.000841	3820.07	0.00161	3820.07	0.00112975	3820.07	0.000761747	3820.07	0.00086093	3820.07	0.00200593
3822	-0.00115	3822	-0.00236	3822	0.000979	3822	0.000477433	3822	-0.00120366	3822	-0.000895023	3822	-0.000575	3822	-0.00081	3822	-0.00108981	3822	-0.000528216	3822	0.000158072	3822	-0.000589013
3823.93	-0.00108	3823.93	-0.00197	3823.93	0.0012	3823.93	-0.000283956	3823.93	-0.00244141	3823.93	-0.00208378	3823.93	-0.000464	3823.93	-0.000914	3823.93	-0.00126612	3823.93	-0.00119162	3823.93	-0.000254035	3823.93	-0.00103927
3825.86	-0.000502	3825.86	-0.00107	3825.86	0.00209	3825.86	0.00025177	3825.86	-0.0018636	3825.86	-0.00218987	3825.86	6.49e-05	3825.86	-0.00012	3825.86	-0.000694752	3825.86	-0.00126088	3825.86	-0.000349164	3825.86	-0.000421405
3827.79	-0.000475	3827.79	-0.000669	3827.79	0.00224	3827.79	-0.000104427	3827.79	-0.00127459	3827.79	-0.00270236	3827.79	-5.89e-05	3827.79	0.000134	3827.79	-0.00056845	3827.79	-0.00117087	3827.79	-0.000750423	3827.79	-0.000256181
3829.71	-0.000164	3829.71	-9.97e-05	3829.71	0.00241	3829.71	-0.000688672	3829.71	-0.000843406	3829.71	-0.00239313	3829.71	2.01e-05	3829.71	0.000706	3829.71	2.99215e-05	3829.71	0.000120401	3829.71	-0.000745535	3829.71	0.000193357
3831.64	0.000173	3831.64	0.000131	3831.64	0.00259	3831.64	-0.000430822	3831.64	-0.000547886	3831.64	-0.00149763	3831.64	0.000123	3831.64	0.00132	3831.64	0.000471532	3831.64	0.00180817	3831.64	-0.000528097	3831.64	0.000862956
3833.57	0.00049	3833.57	0.000144	3833.57	0.00291	3833.57	0.00114953	3833.57	0.000448227	3833.57	-0.000207901	3833.57	0.00052	3833.57	0.00206	3833.57	0.000816166	3833.57	0.00199306	3833.57	0.000255108	3833.57	0.00129211
3835.5	0.000972	3835.5	0.000396	3835.5	0.00334	3835.5	0.00328744	3835.5	0.0021795	3835.5	0.0011369	3835.5	0.00158	3835.5	0.00294	3835.5	0.00152665	3835.5	0.00111866	3835.5	0.00159609	3835.5	0.00127888
3837.43	0.000636	3837.43	-1.22e-05	3837.43	0.00281	3837.43	0.00411236	3837.43	0.00256348	3837.43	0.00123203	3837.43	0.00201	3837.43	0.0024	3837.43	0.00132132	3837.43	0.000687361	3837.43	0.00139487	3837.43	0.000950456
3839.36	-0.000359	3839.36	-0.00112	3839.36	0.0017	3839.36	0.00257873	3839.36	0.000974059	3839.36	0.000328064	3839.36	0.00104	3839.36	0.000621	3839.36	0.000185549	3839.36	0.0004493	3839.36	-0.000446081	3839.36	0.0012207
3841.28	-0.000903	3841.28	-0.00182	3841.28	0.00128	3841.28	0.000552416	3841.28	-0.000990033	3841.28	-0.000631213	3841.28	-0.000141	3841.28	-0.000356	3841.28	-0.000423312	3841.28	-0.000563741	3841.28	-0.00152242	3841.28	0.00134134
3843.21	-0.00153	3843.21	-0.00225	3843.21	0.00106	3843.21	-0.000751257	3843.21	-0.00279915	3843.21	-0.00202465	3843.21	-0.000989	3843.21	-0.000845	3843.21	-0.00106126	3843.21	-0.00164843	3843.21	-0.00203836	3843.21	2.90871e-05
3845.14	-0.00189	3845.14	-0.00213	3845.14	0.00122	3845.14	-0.000983715	3845.14	-0.00284994	3845.14	-0.00285065	3845.14	-0.00107	3845.14	-0.000818	3845.14	-0.00137764	3845.14	-0.00136221	3845.14	-0.00224519	3845.14	-0.00124478
3847.07	-0.00101	3847.07	-0.000802	3847.07	0.00239	3847.07	0.000629783	3847.07	-0.000218034	3847.07	-0.00148284	3847.07	9.1e-05	3847.07	0.000685	3847.07	-1.43051e-06	3847.07	0.000589848	3847.07	-0.0012027	3847.07	-0.000620365
3849	0.001	3849	0.00147	3849	0.00442	3849	0.00446212	3849	0.00393808	3849	0.00215304	3849	0.00216	3849	0.00347	3849	0.00311106	3849	0.0031209	3849	0.00140166	3849	0.00188148
3850.93	0.00282	3850.93	0.00317	3850.93	0.00599	3850.93	0.00898063	3850.93	0.00764203	3850.93	0.00591147	3850.93	0.00381	3850.93	0.0056	3850.93	0.0059256	3850.93	0.00473726	3850.93	0.00399899	3850.93	0.00446725
3852.85	0.0011	3852.85	0.000844	3852.85	0.00365	3852.85	0.00741672	3852.85	0.0059433	3852.85	0.0038904	3852.85	0.00192	3852.85	0.00295	3852.85	0.00305337	3852.85	0.0033313	3852.85	0.00222444	3852.85	0.00263905
3854.78	-0.00241	3854.78	-0.00277	3854.78	-0.000151	3854.78	0.000171184	3854.78	-9.65595e-05	3854.78	-0.00199318	3854.78	-0.00147	3854.78	-0.00145	3854.78	-0.00258243	3854.78	-0.000114322	3854.78	-0.00233579	3854.78	-0.00172687
3856.71	-0.00243	3856.71	-0.00243	3856.71	0.000224	3856.71	-0.00133848	3856.71	-0.00186825	3856.71	-0.00273108	3856.71	-0.00135	3856.71	-0.0012	3856.71	-0.00253004	3856.71	-0.00177193	3856.71	-0.00316799	3856.71	-0.00214851
3858.64	-0.00114	3858.64	-0.00101	3858.64	0.00203	3858.64	0.000696778	3858.64	-0.000838757	3858.64	-0.00114346	3858.64	0.00013	3858.64	0.0006	3858.64	-0.000408709	3858.64	-0.00176322	3858.64	-0.00197554	3858.64	-0.00109541
3860.57	-4.74e-05	3860.57	8.74e-05	3860.57	0.0035	3860.57	0.00323832	3860.57	0.00134385	3860.57	0.000423431	3860.57	0.00153	3860.57	0.00205	3860.57	0.00128168	3860.57	-0.000110984	3860.57	-9.09567e-05	3860.57	0.000140429
3862.5	0.000207	3862.5	0.000559	3862.5	0.00383	3862.5	0.00433016	3862.5	0.00281823	3862.5	0.000721812	3862.5	0.00195	3862.5	0.00236	3862.5	0.00153023	3862.5	0.00219595	3862.5	0.00145388	3862.5	0.00113499
3864.42	-0.000375	3864.42	0.000329	3864.42	0.0031	3864.42	0.00325966	3864.42	0.00199282	3864.42	-0.000722766	3864.42	0.00112	3864.42	0.00157	3864.42	0.000442624	3864.42	0.00276327	3864.42	0.00171769	3864.42	0.00102305
3866.35	-0.000147	3866.35	0.000734	3866.35	0.00331	3866.35	0.00322366	3866.35	0.00132048	3866.35	-0.00131285	3866.35	0.00102	3866.35	0.00174	3866.35	0.000751376	3866.35	0.00189376	3866.35	0.00202787	3866.35	0.00089097
3868.28	0.000367	3868.28	0.00116	3868.28	0.00389	3868.28	0.00435758	3868.28	0.00137341	3868.28	-0.000990868	3868.28	0.00139	3868.28	0.00235	3868.28	0.00173879	3868.28	0.000950337	3868.28	0.00249982	3868.28	0.00091815
3870.21	-0.000272	3870.21	0.000303	3870.21	0.00315	3870.21	0.00397968	3870.21	0.000641108	3870.21	-0.00156498	3870.21	0.000626	3870.21	0.00144	3870.21	0.000968993	3870.21	0.000375867	3870.21	0.00138605	3870.21	0.000325084
3872.14	-0.000855	3872.14	-0.000241	3872.14	0.00239	3872.14	0.00276446	3872.14	5.97239e-05	3872.14	-0.00257933	3872.14	-4.49e-05	3872.14	0.000426	3872.14	3.76701e-05	3872.14	0.00109231	3872.14	-0.000518203	3872.14	-0.000141144
3874.07	-0.00124	3874.07	-0.000379	3874.07	0.002	3874.07	0.00153458	3874.07	-0.000692964	3874.07	-0.0035907	3874.07	-0.000395	3874.07	-4.08e-05	3874.07	-0.000628889	3874.07	0.00162625	3874.07	-0.00168002	3874.07	-0.000899553
3875.99	-0.00107	3875.99	-0.000184	3875.99	0.00227	3875.99	0.00112748	3875.99	-0.00140846	3875.99	-0.00313628	3875.99	-0.000298	3875.99	0.000399	3875.99	-0.000555873	3875.99	0.00148094	3875.99	-0.00128126	3875.99	-0.00119782
3877.92	-8.76e-06	3877.92	0.000737	3877.92	0.00335	3877.92	0.00206363	3877.92	-0.00087595	3877.92	-0.00141835	3877.92	0.00072	3877.92	0.00187	3877.92	0.000921071	3877.92	0.00170136	3877.92	0.000203133	3877.92	-0.000187397
3879.85	0.000296	3879.85	0.000847	3879.85	0.00345	3879.85	0.00204682	3879.85	-0.000366807	3879.85	-0.00142086	3879.85	0.00121	3879.85	0.00219	3879.85	0.00133169	3879.85	0.00117683	3879.85	0.000649214	3879.85	0.000156999
3881.78	0.000158	3881.78	0.000339	3881.78	0.00308	3881.78	0.000962019	3881.78	8.22544e-06	3881.78	-0.00164604	3881.78	0.00127	3881.78	0.00162	3881.78	0.000874281	3881.78	0.000257731	3881.78	0.000490904	3881.78	5.6386e-05
3883.71	0.000305	3883.71	3.54e-05	3883.71	0.00316	3883.71	0.000290632	3883.71	0.00074029	3883.71	-0.000780821	3883.71	0.00126	3883.71	0.00137	3883.71	0.000870168	3883.71	3.31402e-05	3883.71	0.000999093	3883.71	0.000175595
3885.64	-0.000738	3885.64	-0.000904	3885.64	0.00224	3885.64	-0.000862718	3885.64	0.000144243	3885.64	-0.00147855	3885.64	-0.000109	3885.64	0.000495	3885.64	-0.00036794	3885.64	-0.000825167	3885.64	0.00070262	3885.64	-0.00116897
3887.56	-0.0013	3887.56	-0.00089	3887.56	0.00193	3887.56	-0.000713944	3887.56	-0.000472069	3887.56	-0.00147605	3887.56	-0.000668	3887.56	0.000744	3887.56	-0.000852644	3887.56	-0.00124383	3887.56	0.000248313	3887.56	-0.00137627
3889.49	-0.000603	3889.49	8.38e-05	3889.49	0.0027	3889.49	0.00105226	3889.49	-4.52995e-05	3889.49	-0.000215769	3889.49	0.000295	3889.49	0.00195	3889.49	-8.72016e-05	3889.49	-0.000936747	3889.49	0.000491023	3889.49	0.000524998
3891.42	-0.000735	3891.42	-6.17e-05	3891.42	0.00225	3891.42	0.0011338	3891.42	-0.000469804	3891.42	-0.00115252	3891.42	0.000273	3891.42	0.00158	3891.42	-0.000785828	3891.42	-0.00184393	3891.42	0.00010109	3891.42	0.000986099
3893.35	-0.00118	3893.35	-0.000349	3893.35	0.00149	3893.35	-0.000221252	3893.35	-0.00108659	3893.35	-0.00275719	3893.35	-0.000275	3893.35	0.000909	3893.35	-0.00151902	3893.35	-0.00298202	3893.35	-0.00058353	3893.35	-0.000120401
3895.28	-0.000354	3895.28	0.000783	3895.28	0.00246	3895.28	0.000253916	3895.28	0.000136375	3895.28	-0.00180852	3895.28	0.000568	3895.28	0.00202	3895.28	-0.000192523	3895.28	-0.00232387	3895.28	-0.000113487	3895.28	0.000325322
3897.21	0.00096	3897.21	0.00207	3897.21	0.00404	3897.21	0.00211155	3897.21	0.0023675	3897.21	0.000467777	3897.21	0.00187	3897.21	0.00358	3897.21	0.00159877	3897.21	-0.00032723	3897.21	0.000958919	3897.21	0.00224876
3899.14	0.00154	3899.14	0.00214	3899.14	0.00475	3899.14	0.00367427	3899.14	0.00367916	3899.14	0.00205076	3899.14	0.00231	3899.14	0.00396	3899.14	0.00232154	3899.14	0.00184691	3899.14	0.00146234	3899.14	0.00380135
3901.06	0.00113	3901.06	0.00128	3901.06	0.00441	3901.06	0.00448573	3901.06	0.00325954	3901.06	0.0020982	3901.06	0.00205	3901.06	0.00325	3901.06	0.00190473	3901.06	0.00303221	3901.06	0.00136244	3901.06	0.00391138
3902.99	-1.13e-05	3902.99	0.000118	3902.99	0.00336	3902.99	0.00360572	3902.99	0.00159168	3902.99	0.000401974	3902.99	0.00124	3902.99	0.00178	3902.99	0.000357211	3902.99	0.00246	3902.99	0.000828147	3902.99	0.00307488
3904.92	-0.00125	3904.92	-0.00102	3904.92	0.00196	3904.92	0.000625372	3904.92	-0.000190496	3904.92	-0.00223792	3904.92	-0.00015	3904.92	3.8e-05	3904.92	-0.00158429	3904.92	0.000543356	3904.92	-0.000453949	3904.92	0.00166845
3906.85	-0.00149	3906.85	-0.00134	3906.85	0.00131	3906.85	-0.00135016	3906.85	-0.00106382	3906.85	-0.00343847	3906.85	-0.000886	3906.85	-0.000458	3906.85	-0.00200737	3906.85	-0.00116324	3906.85	-0.00133979	3906.85	0.000267744
3908.78	-0.00105	3908.78	-0.00102	3908.78	0.00142	3908.78	-0.00120831	3908.78	-0.00202549	3908.78	-0.00286269	3908.78	-0.000837	3908.78	5.98e-05	3908.78	-0.00132143	3908.78	-0.00198185	3908.78	-0.00126457	3908.78	-0.000585794
3910.71	-0.000683	3910.71	-0.000678	3910.71	0.00175	3910.71	-0.000680447	3910.71	-0.00300181	3910.71	-0.00190949	3910.71	-0.000618	3910.71	0.000558	3910.71	-0.000891268	3910.71	-0.0018847	3910.71	-0.000929952	3910.71	-0.000930667
3912.63	-0.000252	3912.63	-0.000128	3912.63	0.00245	3912.63	-0.00030911	3912.63	-0.00198483	3912.63	-0.00124001	3912.63	-9.67e-05	3912.63	0.00121	3912.63	-0.000492334	3912.63	-0.000944495	3912.63	-0.000574231	3912.63	-0.000684142
3914.56	0.000306	3914.56	0.000701	3914.56	0.00331	3914.56	0.000577092	3914.56	0.000244021	3914.56	-0.000671744	3914.56	0.000686	3914.56	0.00208	3914.56	0.000248909	3914.56	0.000179052	3914.56	-0.000144124	3914.56	-0.000160336
3916.49	0.000285	3916.49	0.000896	3916.49	0.00338	3916.49	0.00121403	3916.49	0.000657916	3916.49	-0.000225902	3916.49	0.000866	3916.49	0.00212	3916.49	0.000393391	3916.49	0.000517488	3916.49	-0.000123978	3916.49	-0.000403047
3918.42	-0.000356	3918.42	0.000214	3918.42	0.00265	3918.42	0.000506043	3918.42	-0.000281572	3918.42	-0.000180125	3918.42	0.000166	3918.42	0.00139	3918.42	-0.000294685	3918.42	5.93662e-05	3918.42	-0.000658393	3918.42	-0.00114489
3920.35	-0.000512	3920.35	-1.12e-05	3920.35	0.00237	3920.35	-3.06368e-05	3920.35	-1.03712e-05	3920.35	-0.000435948	3920.35	-0.000294	3920.35	0.00137	3920.35	-0.000465334	3920.35	4.29153e-06	3920.35	-0.000914455	3920.35	-0.000783563
3922.28	-4.35e-06	3922.28	0.000473	3922.28	0.00263	3922.28	0.000765204	3922.28	0.00104213	3922.28	-0.00069952	3922.28	-0.000104	3922.28	0.00188	3922.28	-4.05908e-05	3922.28	0.00061965	3922.28	-0.000501156	3922.28	0.000407696
3924.2	0.000154	3924.2	0.000543	3924.2	0.00248	3924.2	0.00119281	3924.2	0.00120115	3924.2	-0.00136983	3924.2	-7.57e-06	3924.2	0.0017	3924.2	-0.000172317	3924.2	0.000753522	3924.2	-9.35793e-05	3924.2	0.000777245
3926.13	2.44e-05	3926.13	0.000229	3926.13	0.00213	3926.13	0.00075984	3926.13	0.00067544	3926.13	-0.00207305	3926.13	0.000139	3926.13	0.00143	3926.13	-0.000434399	3926.13	0.000212431	3926.13	-5.20945e-05	3926.13	5.78165e-05
3928.06	0.000366	3928.06	0.000406	3928.06	0.00238	3928.06	0.00134993	3928.06	0.000963807	3928.06	-0.00156259	3928.06	0.000788	3928.06	0.00214	3928.06	0.000121355	3928.06	0.000174642	3928.06	0.000177622	3928.06	-0.000445485
3929.99	0.000685	3929.99	0.000738	3929.99	0.00275	3929.99	0.00211442	3929.99	0.00183785	3929.99	-0.00055635	3929.99	0.00111	3929.99	0.0026	3929.99	0.000533283	3929.99	0.000331163	3929.99	0.000519633	3929.99	-0.000228763
3931.92	0.000217	3931.92	0.000585	3931.92	0.00231	3931.92	0.000841618	3931.92	0.00155568	3931.92	-0.000565171	3931.92	0.000533	3931.92	0.00163	3931.92	-0.000157356	3931.92	-0.000436068	3931.92	0.000303268	3931.92	-0.000193596
3933.85	-0.000421	3933.85	0.000234	3933.85	0.00166	3933.85	-0.000875235	3933.85	0.000141382	3933.85	-0.00128377	3933.85	-8.15e-05	3933.85	0.00053	3933.85	-0.00102854	3933.85	-0.00125134	3933.85	-0.000167847	3933.85	-0.000797629
3935.77	-0.000612	3935.77	9.76e-05	3935.77	0.00167	3935.77	-0.00112593	3935.77	-0.000783205	3935.77	-0.0018307	3935.77	-0.000182	3935.77	0.000402	3935.77	-0.00108069	3935.77	-0.00105727	3935.77	-0.000250459	3935.77	-0.00106192
3937.7	-0.000457	3937.7	0.000145	3937.7	0.00211	3937.7	-0.000710487	3937.7	-0.000715136	3937.7	-0.00193965	3937.7	-6.57e-05	3937.7	0.000768	3937.7	-0.000489533	3937.7	-0.000308275	3937.7	-1.14441e-05	3937.7	-0.000567079
3939.63	-0.000114	3939.63	0.000377	3939.63	0.00255	3939.63	-0.000346661	3939.63	-0.000172734	3939.63	-0.00152504	3939.63	0.000198	3939.63	0.00125	3939.63	0.000131786	3939.63	0.000544906	3939.63	0.000294566	3939.63	0.00012219
3941.56	-0.000103	3941.56	0.000321	3941.56	0.00257	3941.56	-0.000648141	3941.56	-0.000159144	3941.56	-0.00114477	3941.56	0.000422	3941.56	0.00151	3941.56	4.25577e-05	3941.56	0.000959516	3941.56	0.000184894	3941.56	0.000343561
3943.49	-0.000577	3943.49	-0.000107	3943.49	0.00227	3943.49	-0.00160527	3943.49	-0.000478029	3943.49	-0.000983715	3943.49	0.000421	3943.49	0.00121	3943.49	-0.000568807	3943.49	0.000519156	3943.49	-6.55651e-05	3943.49	0.000179887
3945.42	-0.000647	3945.42	-0.000107	3945.42	0.00229	3945.42	-0.0016104	3945.42	-6.23465e-05	3945.42	-0.000285029	3945.42	0.000566	3945.42	0.00109	3945.42	-0.000534534	3945.42	-6.93798e-05	3945.42	0.000626564	3945.42	0.000296474
3947.34	-0.000327	3947.34	0.000185	3947.34	0.00233	3947.34	-0.00086534	3947.34	0.000224948	3947.34	9.53674e-05	3947.34	0.000675	3947.34	0.00136	3947.34	-0.000172734	3947.34	-0.000443339	3947.34	0.00150144	3947.34	0.000310183
3949.27	-0.000447	3949.27	-2.34e-05	3949.27	0.00201	3949.27	-0.000957727	3949.27	-0.000307679	3949.27	-0.000831127	3949.27	0.000352	3949.27	0.00131	3949.27	-0.000378311	3949.27	-0.000906587	3949.27	0.0011965	3949.27	-0.000292182
3951.2	-0.000905	3951.2	-0.000434	3951.2	0.00181	3951.2	-0.00117028	3951.2	-0.000375271	3951.2	-0.00145149	3951.2	1.13e-05	3951.2	0.000991	3951.2	-0.000661314	3951.2	-0.00159538	3951.2	0.000276566	3951.2	-0.000830173
3953.13	-0.00108	3953.13	-0.00039	3953.13	0.0018	3953.13	-0.000468254	3953.13	0.00067997	3953.13	-0.000971556	3953.13	3.56e-05	3953.13	0.000908	3953.13	-0.000521421	3953.13	-0.00229168	3953.13	-0.000131249	3953.13	-0.000935554
3955.06	-0.000969	3955.06	-6.43e-05	3955.06	0.00174	3955.06	-0.000100613	3955.06	0.00170577	3955.06	-0.00077939	3955.06	0.000307	3955.06	0.00104	3955.06	-0.000319541	3955.06	-0.00245547	3955.06	6.90222e-05	3955.06	-0.000943184
3956.99	-0.000872	3956.99	4.46e-05	3956.99	0.00167	3956.99	-0.0007267	3956.99	0.00145495	3956.99	-0.00104368	3956.99	0.000436	3956.99	0.00108	3956.99	-0.000321567	3956.99	-0.00188625	3956.99	0.000103593	3956.99	-0.00089395
3958.91	-0.000844	3958.91	-0.000123	3958.91	0.00179	3958.91	-0.00109351	3958.91	0.00034976	3958.91	-0.000777721	3958.91	0.000232	3958.91	0.000922	3958.91	-0.000350058	3958.91	-0.000899553	3958.91	-0.000507236	3958.91	-0.000680447
3960.84	-0.000925	3960.84	-0.000327	3960.84	0.00196	3960.84	-0.000848651	3960.84	-0.0007478	3960.84	-0.00055325	3960.84	-7.53e-05	3960.84	0.000556	3960.84	-0.000427067	3960.84	-0.000127196	3960.84	-0.00127614	3960.84	-0.000471234
3962.77	-0.00118	3962.77	-0.00053	3962.77	0.00172	3962.77	-0.000791192	3962.77	-0.00190234	3962.77	-0.000953317	3962.77	-0.000326	3962.77	0.000125	3962.77	-0.000661671	3962.77	-0.000298142	3962.77	-0.00156987	3962.77	-0.000495315
3964.7	-0.00145	3964.7	-0.000729	3964.7	0.00122	3964.7	-0.00104356	3964.7	-0.00262225	3964.7	-0.00110054	3964.7	-0.000476	3964.7	7.06e-05	3964.7	-0.000787079	3964.7	-0.00104129	3964.7	-0.00113809	3964.7	-0.000672936
3966.63	-0.00156	3966.63	-0.000775	3966.63	0.00101	3966.63	-0.00122678	3966.63	-0.00226593	3966.63	-0.000879169	3966.63	-0.000395	3966.63	0.000362	3966.63	-0.000706077	3966.63	-0.00102782	3966.63	-0.000329018	3966.63	-0.000619412
3968.56	-0.00149	3968.56	-0.000752	3968.56	0.00115	3968.56	-0.00103807	3968.56	-0.00176644	3968.56	-0.000742912	3968.56	-6.92e-05	3968.56	0.000667	3968.56	-0.000570774	3968.56	-0.000397325	3968.56	0.000196099	3968.56	-0.000295162
3970.48	-0.00146	3970.48	-0.000865	3970.48	0.00129	3970.48	-0.000639677	3970.48	-0.00189281	3970.48	-0.000709772	3970.48	0.00018	3970.48	0.000877	3970.48	-0.000412583	3970.48	-0.000684977	3970.48	0.000320315	3970.48	-0.000123501
3972.41	-0.00159	3972.41	-0.000991	3972.41	0.00123	3972.41	-0.000474811	3972.41	-0.00187063	3972.41	-0.00101399	3972.41	5.32e-05	3972.41	0.000995	3972.41	-0.000248849	3972.41	-0.00156534	3972.41	0.00042963	3972.41	-0.00029552
3974.34	-0.00177	3974.34	-0.00105	3974.34	0.00113	3974.34	-0.000504374	3974.34	-0.00156164	3974.34	-0.00161564	3974.34	-0.00029	3974.34	0.000985	3974.34	-0.000303686	3974.34	-0.00127792	3974.34	0.000657082	3974.34	-0.000635028
3976.27	-0.00184	3976.27	-0.00118	3976.27	0.00116	3976.27	-0.000467062	3976.27	-0.00184262	3976.27	-0.0017364	3976.27	-0.000561	3976.27	0.000873	3976.27	-0.000615954	3976.27	-0.000114679	3976.27	0.000736713	3976.27	-0.000759959
3978.2	-0.00169	3978.2	-0.00134	3978.2	0.00122	3978.2	-0.000417829	3978.2	-0.00252438	3978.2	-0.00122798	3978.2	-0.00072	3978.2	0.000879	3978.2	-0.000834346	3978.2	0.000192285	3978.2	0.000454068	3978.2	-0.00047183
3980.13	-0.00157	3980.13	-0.00142	3980.13	0.0013	3980.13	-0.000346899	3980.13	-0.00265324	3980.13	-0.000746131	3980.13	-0.000841	3980.13	0.000912	3980.13	-0.000849307	3980.13	-0.000628114	3980.13	8.46386e-05	3980.13	-0.000103474
3982.05	-0.00181	3982.05	-0.00139	3982.05	0.00138	3982.05	1.19209e-07	3982.05	-0.00240719	3982.05	-0.000568628	3982.05	-0.000943	3982.05	0.000696	3982.05	-0.000871658	3982.05	-0.00156426	3982.05	-2.0504e-05	3982.05	-0.000166535
3983.98	-0.00219	3983.98	-0.00128	3983.98	0.00134	3983.98	0.000349522	3983.98	-0.00243843	3983.98	-0.000798464	3983.98	-0.000944	3983.98	0.000416	3983.98	-0.000879705	3983.98	-0.00196195	3983.98	-7.62939e-05	3983.98	-0.000499487
3985.91	-0.00221	3985.91	-0.00112	3985.91	0.00126	3985.91	0.000328183	3985.91	-0.00239193	3985.91	-0.00130737	3985.91	-0.000832	3985.91	0.000393	3985.91	-0.000596345	3985.91	-0.00193822	3985.91	-0.00013721	3985.91	-0.000282407
3987.84	-0.00191	3987.84	-0.000998	3987.84	0.0012	3987.84	0.00014925	3987.84	-0.00178194	3987.84	-0.00157618	3987.84	-0.000758	3987.84	0.000644	3987.84	-0.000243366	3987.84	-0.00198901	3987.84	3.96967e-05	3987.84	0.000440717
3989.77	-0.00177	3989.77	-0.000935	3989.77	0.00109	3989.77	-0.00019896	3989.77	-0.000903487	3989.77	-0.00132883	3989.77	-0.000709	3989.77	0.000918	3989.77	-0.000325322	3989.77	-0.00214493	3989.77	0.000316382	3989.77	0.000735998
3991.7	-0.00188	3991.7	-0.000944	3991.7	0.00104	3991.7	-0.000671267	3991.7	-0.000260115	3991.7	-0.000737786	3991.7	-0.000497	3991.7	0.00102	3991.7	-0.000651419	3991.7	-0.00180447	3991.7	0.000652552	3991.7	0.000501394
3993.62	-0.00183	3993.62	-0.000991	3993.62	0.00116	3993.62	-0.000695467	3993.62	2.0504e-05	3993.62	-0.000417709	3993.62	-0.000204	3993.62	0.000933	3993.62	-0.00084585	3993.62	-0.000759721	3993.62	0.000867486	3993.62	0.0003829
3995.55	-0.00164	3995.55	-0.00103	3995.55	0.00142	3995.55	-9.03606e-05	3995.55	-0.000177264	3995.55	-0.000593662	3995.55	-0.000149	3995.55	0.000713	3995.55	-0.000900924	3995.55	0.00054276	3995.55	0.000461459	3995.55	0.000432611
3997.48	-0.00175	3997.48	-0.00113	3997.48	0.00168	3997.48	0.000671744	3997.48	-0.000713468	3997.48	-0.000634432	3997.48	-0.000379	3997.48	0.000535	3997.48	-0.000770748	3997.48	0.00120735	3997.48	-0.000365257	3997.48	0.000533938
3999.41	-0.00207	3999.41	-0.00134	3999.41	0.0017	3999.41	0.000696778	3999.41	-0.000924468	3999.41	-0.000121236	3999.41	-0.00059	3999.41	0.00046	3999.41	-0.000447452	3999.41	0.000698209	3999.41	-0.000827074	3999.41	0.000987649
4001.34	-0.00215	4001.34	-0.00157	4001.34	0.00147	4001.34	-0.0004493	4001.34	-0.000522971	4001.34	0.000186682	4001.34	-0.000536	4001.34	0.00028	4001.34	-0.000220358	4001.34	-0.000284314	4001.34	-0.000528216	4001.34	0.00172186
